## **MinION barcodes: biodiversity discovery and identification by everyone, for everyone**

**Amrita Srivathsan<sup>1</sup>, Leshon Lee<sup>1</sup>, Kazutaka Katoh<sup>2,3</sup>, Emily Hartop<sup>4,5</sup>, Sujatha Narayanan Kutty<sup>1,6</sup>, Johnathan Wong<sup>1</sup>, Darren Yeo<sup>1</sup>, Rudolf Meier<sup>1</sup>**

<sup>1</sup> Department of Biological Sciences, National University of Singapore, Singapore

<sup>2</sup> Research Institute for Microbial Diseases, Osaka University, Japan

<sup>3</sup> Artificial Intelligence Research Center, AIST, Tokyo, Japan

<sup>4</sup> Zoology Department, Stockholms Universitet, Stockholm, Sweden

<sup>5</sup> Station Linné, Öland, Sweden

<sup>6</sup> Tropical Marine Science Institute, National University of Singapore, Singapore

1 **Abstract**

2 DNA barcodes are a useful tool for discovering, understanding, and monitoring biodiversity  
3 which are critical at a time when biodiversity loss is a major problem for many countries.  
4 However, widespread adoption of barcodes requires cost-effective and simple barcoding  
5 methods. We here present a workflow that satisfies these conditions. It was developed via  
6 “innovation through subtraction” and thus requires minimal lab equipment, can be learned  
7 within days, reduces the barcode sequencing cost to <10 cents, and allows fast turnaround  
8 from specimen to sequence by using the real-time sequencer MinION. We first describe  
9 cost-effective and rapid procedures for obtaining tagged amplicons. We then demonstrate  
10 how a portable MinION device can be used for real-time sequencing of tagged amplicons in  
11 many settings (field stations, biodiversity labs, citizen science labs, schools). Small projects  
12 can use the flow cell dongle (“Flongle”) while large projects can rely on MinION flow cells  
13 that can be stopped and re-used after collecting sufficient data for a given project. We also  
14 provide amplicon coverage recommendations that are based on several runs of MinION flow  
15 cells (R10.3) which suggest that each run can generate >10,000 barcodes. Next, we present  
16 a novel software, ONTbarcoder, which overcomes the bioinformatics challenges posed by  
17 the sequencing errors of MinION reads. This software is compatible with Windows10,  
18 Macintosh, and Linux, has a graphical user interface (GUI), and can generate thousands of  
19 barcodes on a standard laptop within hours based on two input files (FASTQ, demultiplexing  
20 file). We document that MinION barcodes are virtually identical to Sanger and Illumina  
21 barcodes for the same specimens (>99.99%). Lastly, we demonstrate how rapidly MinION  
22 data have improved by comparing the performance of sequential flow cell generations. We  
23 overall assert that barcoding with MinION is the way forward for government agencies,  
24 universities, museums, and schools because it combines low consumable and capital cost  
25 with scalability. Biodiversity loss is threatening the planet and the use of MinION barcodes  
26 will help with enabling an army of researchers and citizen scientists, which is necessary for  
27 effective biodiversity discovery and monitoring.

## 29 **1. Background**

30 DNA sequences have been used for identification and taxonomic purposes for decades  
31 (Hebert, Cywinska et al. 2003, Tautz, Arctander et al. 2003, Meier 2008), but for most of this  
32 time been akin to mobile phones in the 1990s: of limited value due to sparse signal coverage  
33 and high cost. Obtaining barcodes was problematic due largely to the complicated and  
34 expensive procedures on which it relied. Some of these problems have since been  
35 addressed by, for example, developing effective DNA extraction protocols and optimizing  
36 Sanger sequencing procedures (Ivanova, Dewaard et al. 2006, Ivanova, Borisenko et al.  
37 2009). These improvements enabled the establishment of a centralized barcoding facility in  
38 2006. After 15 years and the investment of >200 million USD, ca. 8 million animal barcodes  
39 are available for searches on BOLD Systems, but only ca. 6 million are in the public domain  
40 ([http://boldsystems.org/index.php/IDS\\_OpenIdEngine](http://boldsystems.org/index.php/IDS_OpenIdEngine)). Combined with barcodes from NCBI  
41 GenBank, they are now a valuable resource to the global biodiversity community. However,  
42 the cost of barcodes has remained high (<http://ccdb.ca/pricing/>) and the prevalent approach  
43 for sizeable projects is sending specimens from all over the world to one center and then  
44 only some back to the country of origin. This interferes with real-time biodiversity monitoring  
45 and specimen accessibility. We therefore argue that access to barcodes has to be  
46 democratized through decentralization. We here show that this achievable because the  
47 application of a technique that is known as “innovation through subtraction” in engineering  
48 readily yields simplified and cost-effective solutions for DNA barcoding and the amplification  
49 and sequencing of a short mitochondrial COI fragment can be efficiently performed  
50 anywhere and by biologists and citizen scientists alike.

51

52 A decentralized model for monitoring the world’s biodiversity is necessary given the scale,  
53 urgency, and importance of the task at hand. For example, even if there were only 10 million  
54 species of metazoan animals on the planet (Stork, McBroom et al. 2015) and a new species  
55 is discovered with every 50<sup>th</sup> specimen that is processed, species discovery with barcodes  
56 will require the sequencing of 500 million specimens (Yeo, Srivathsan et al. 2020). Yet,

57 species discovery is only a small part of the biodiversity challenge in the 21<sup>st</sup> century.  
58 Biodiversity loss is now considered by the World Economic Forum as one of the top three  
59 global risks based on likelihood and impact for the next 10 years (World Economic Forum  
60 2020) and Swiss Re estimates that 20% of all countries face ecosystem collapse as  
61 biodiversity declines (Swiss Re 2020). Biodiversity loss is no longer just an academic  
62 concern; it is now a major threat to human communities and the health of the planet. This  
63 also implies that biodiversity discovery and monitoring require completely different scales  
64 than in the past. The old approaches thus need rethinking because all countries need real-  
65 time distributional and abundance information to develop effective conservation strategies  
66 and policies. In addition, they need information on how species interact with each other and  
67 the environment (Abrego, Roslin et al. 2021). Many of these biodiversity monitoring and  
68 environmental management activities have to focus on terrestrial invertebrates, whose  
69 biomass surpasses that of all terrestrial vertebrates combined (Bar-On, Phillips et al. 2018)  
70 and who occupy a broad range of ecological guilds. The main obstacles are high numbers of  
71 specimens and species and the rapid decline of many of these taxa (Bell, Blumgart et al.  
72 2020, Eisenhauer, Bonn et al. 2019, Hallman, Sorg et al. 2017, Hallman, Ssymank et al.  
73 2021, Stepanian, Entekin et al. 2020, Wagner, Grames et al. 2021) which means that  
74 monitoring should be locally conducted to allow for rapid turnaround. This requires simple  
75 and cost-effective procedures that can be implemented anywhere by stakeholders with very  
76 different scientific and skill backgrounds.

77

78 DNA barcoding was proposed at a time when biodiversity loss was not on the radar of  
79 economists. Instead, barcodes were initially intended as an identification tool for biologists  
80 (Hebert, Cywinska et al. 2003). Thus, most projects focused on taxa with a large following in  
81 biology (e.g., birds, fish, butterflies) (Kwong, Srivathsan et al. 2012). However, this also  
82 meant that these projects only covered a small proportion of the terrestrial animal biomass  
83 (Bar-On, Phillips et al. 2018) and species-level diversity (Groombridge 1992). Yet, despite  
84 targeting taxa with well-understood diversity, the projects struggled with covering >75% of

85 the described species in these groups (Kwong, Srivathsan et al. 2012). When the pilot  
86 barcoding projects ran out of material from identified specimens, they started targeting  
87 unidentified specimens; i.e., DNA barcoding morphed into a technique that was used for  
88 biodiversity discovery (“dark taxa”: Page 2011, Kwong, Srivathsan et al. 2012). This shift  
89 towards biodiversity discovery was gradual and incomplete because the projects used a  
90 “hybrid approach” that started with subsampling or sorting specimens to “morphospecies”  
91 before barcoding representatives of each morphospecies/sample (e.g., Barrett and Hebert  
92 2005, Hendrich, Pons et al. 2010, Hebert, DeWaard et al. 2013, Ng'endo, Osiemo et al.  
93 2013, Hebert, Ratnasingham et al. 2016, Thormann, Ahrens et al. 2016, Knox, Hogg et al.  
94 2020). This is problematic, as morphospecies sorting is known to be labour-intensive and of  
95 unpredictable quality because it is heavily dependent on the taxonomic expertise of the  
96 sorters (Krell 2004, Stribling, Pavlik et al. 2008). Thus, such hybrid approaches are of limited  
97 value for obtaining reliable quantitative data on biodiversity, but were adopted as a  
98 compromise owing to the prohibitive cost of barcoding. The logical alternative is to barcode  
99 all specimens and then group them into putative species based on sequence information.  
100 Such a “reverse workflow” (Wang, Srivathsan et al. 2018), where every specimen is  
101 barcoded as the initial pre-sorting step, yields quantitative data and corroborated species-  
102 level units. However, the reverse workflow requires efficient and low-cost barcoding methods  
103 that are also suitable for biodiverse countries with limited science funding.  
104  
105 Fortunately, such cost-effective barcoding methods are now becoming available. This is  
106 partially due to the replacement of Sanger sequencing with second- and third-generation  
107 sequencing technologies that have lowered sequencing costs dramatically (Shokralla, Spall  
108 et al. 2012, Shokralla, Porter et al. 2015, Meier, Wong et al. 2016, Hebert, Braukmann et al.  
109 2018, Krehenwinkel, Kennedy et al. 2018, Srivathsan, Baloglu et al. 2018, Wang, Srivathsan  
110 et al. 2018, Srivathsan, Hartop et al. 2019, Yeo, Srivathsan et al. 2020). Such changes mean  
111 that the reverse workflow is now available for tackling the species-level diversity of those  
112 metazoan clades that are so specimen- and species-rich that they have been neglected in

113 the past (Ponder and Lunney 1999, Srivathsan, Hartop et al. 2019). Many of these clades  
114 have high spatial species turnover, requiring many localities in each country to be sampled  
115 and massive numbers of specimens to be processed (Yeo, Srivathsan et al. 2020). Such  
116 intensive processing is best achieved close to the collecting locality to avoid the  
117 unnecessary risks, delays and costs from shipping biodiversity samples across continents.  
118 This is now feasible because biodiversity discovery can be readily pursued in decentralized  
119 facilities at varied scales. Indeed, accelerated biodiversity discovery is a rare example of a  
120 big science initiative that allows for meaningful engagement of students and citizen scientists  
121 and can in turn significantly enhance biodiversity education and appreciation (Pomerantz,  
122 Peñafiel et al. 2018, Watsa, Erkenwick et al. 2020). This is especially so when stakeholders  
123 not only barcode, but also image specimens, determine species abundances, and map  
124 distributions of newly discovered species. All of which can be based on specimens collected  
125 in their own backyard.

126

127 But can such decentralized biodiversity discovery really be effective? Within the last five  
128 years, the students and interns in the laboratory of the corresponding author at the National  
129 University of Singapore barcoded >330,000 specimens. After analyzing the first >140,000  
130 barcoded specimens for selected taxa representing different ecological guilds, the alpha and  
131 beta diversity of Singapore's arthropod fauna was analyzed based on ~8,000 putative  
132 species which revealed that some habitats were unexpectedly species-rich and harboured  
133 very unique faunas (e.g., mangroves, freshwater swamp: Yeo, Srivathsan et al. 2020;  
134 Baloğlu, Clews et al. 2018). Barcodes even helped with the conservation of charismatic taxa  
135 when they were used to identify the larval habitats for more than half of Singapore's damsel-  
136 and dragonfly species (Yeo, Puniamoorthy et al. 2018) and facilitated species interaction  
137 research and biodiversity surveys based on eDNA (Lim, Tay et al. 2016, Srivathsan,  
138 Nagarajan et al. 2019). Biodiversity appreciation by the public was fostered by featuring  
139 newly discovered species and their species interactions on "Biodiversity of Singapore" (BOS  
140 >15,000 species: <https://singapore.biodiversity.online/>) and dozens of new species have

141 been described and the descriptions of another 150 species are being finalized (Grootaert  
142 2018, Tang, Grootaert et al. 2018, Tang, Yang et al. 2018, Wang, Yamada et al. 2018,  
143 Wang, Yong et al. 2018, Grootaert 2019, Ismay and Ang 2019, Samoh, Satasook et al.  
144 2019, Wang, Yamada et al. 2020).

145

## 146 **2. Methods for the democratization of DNA barcoding through simplification**

147 Barcoding a metazoan specimen requires the successful completion of three steps: (1)  
148 obtaining DNA template, (2) amplifying *COI* via PCR, and (3) sequencing the *COI* amplicon.  
149 Many biologists learn these techniques in university for a range of different genes – from  
150 those that are easy to amplify (short fragments of ribosomal and mitochondrial genes with  
151 well-established primers) to those are difficult (long, single-copy nuclear genes with few  
152 known primers). Fortunately, amplification of short mitochondrial markers like *COI* does not  
153 require the same level of care as nuclear markers. Learning how to barcode efficiently is  
154 hence an exercise of unlearning by applying “innovation through subtraction”. Note that this  
155 unlearning is of critical importance for the democratization of biodiversity discovery with DNA  
156 barcodes and is particularly vital for boosting biodiversity research where it is most needed:  
157 in biodiverse countries with limited science funding.

158

159 In this section, we first briefly summarize commonly used procedures for DNA extraction,  
160 PCR, and sequencing. For each step we then describe how the procedures can be  
161 simplified. In addition to the description, we provide videos for the described procedures  
162 which are available from the YouTube channel “Integrative Biodiversity Discovery”  
163 (<https://www.youtube.com/channel/UC1WowokomhQJRc71FmsUAcg>). Note that all  
164 techniques have been extensively tested in our lab, primarily on invertebrates preserved in  
165 ethanol. Regarding sequencing, we briefly introduce four methods, but our focus is on  
166 MinION sequencing because this device is particularly suitable as the default sequencing  
167 option for decentralized biodiversity discovery.

168

169 Methods for step 1: Obtaining DNA template

170 Most biologists learn that DNA extraction requires tissue digestion, DNA purification, and  
171 DNA elution. This approach is slow and expensive because it frequently involves kits and  
172 consumables that are designed for obtaining the kind of high-quality DNA that is needed for  
173 amplifying “difficult” genes (e.g., long, single-copy nuclear markers). However *COI* is a  
174 mitochondrial gene and thus naturally enriched. Indeed, the tiny mitochondrial genome (16  
175 kbp) usually contributes 0.5-5% of the DNA in a genomic extraction (Arribas, Andújar et al.  
176 2016, Crampton-Platt, Yu et al. 2016). Furthermore, barcoding requires only the  
177 amplification of one short marker (<700 bp) so that not much DNA template is needed. This  
178 allows for using the following simplified procedures that are designed for specimens  
179 containing DNA template of reasonable quality (e.g., Malaise trap specimens collected within  
180 the last 20 years).

181

182 *Simplified DNA “extraction”*: Obtaining template for DNA barcoding need not take more than  
183 20 minutes, does not require DNA purification, and costs essentially nothing. The cheapest,  
184 but not necessarily fastest, method is “directPCR”; i.e., deliberately “contaminating” a PCR  
185 reaction with the DNA of the target organism by adding the entire specimen or a tissue  
186 sample into the PCR reagent mix (Wong, Tay et al. 2014). This method is very fast and  
187 effective for small specimens lacking thick cuticle or skin (Wong, Tay et al. 2014) and works  
188 particularly well for many abundant aquatic invertebrates such as chironomid midges and  
189 larvae. Larger specimens require the use of body parts [leg or antenna: Wong, Tay et al.  
190 (2014)]. Such dissections tend to be labour-intensive if large numbers of specimens must be  
191 processed, but it is a good method for small numbers of samples or in barcoding  
192 experiments that are carried out in poorly equipped labs. Note that the whole body or body  
193 part that is used for directPCR can be recovered after amplification, although soft-bodied  
194 animals may become transparent.

195



196 An alternative to directPCR is buffer-based DNA extraction. This method is also essentially  
197 cost-free because it involves alkaline buffers that are inexpensive, usually available in  
198 molecular labs (e.g., PBS), or can be prepared easily (HotSHOT) (Truett, Heeger et al. 2000,  
199 Thongjued, Chotigeat et al. 2019)). Our preferred method is extraction with HotSHOT, which  
200 we have used for barcoding >50,000 arthropods (Yeo, Srivathsan et al. 2020). We use 10-15  
201  $\mu$ L HotSHOT per specimen. Small specimens are submerged within the well of a microplate  
202 while larger specimens are placed head-first into the well. The tissue need not be entirely  
203 submerged in HotSHOT. DNA is obtained within 20 minutes in a thermocycler via two  
204 heating steps (Truett, Heeger et al. 2000). After neutralization, >20  $\mu$ l of template is available  
205 for amplifying *COI* and the voucher can be recovered. Note that HotSHOT extraction leaves  
206 most of the DNA in the specimen untouched and more high quality DNA can subsequently  
207 be extracted from the same specimen. An alternative to obtaining DNA via lab buffers is the  
208 use of commercial DNA extraction buffers (Kranzfelder, Ekrem et al. 2016). These buffers  
209 have a longer shelf life, and are good alternatives for users who only occasionally barcode  
210 moderate numbers of specimens. In the past, we have used QuickExtract (Srivathsan,  
211 Hartop et al. 2019) and found that 10  $\mu$ l is sufficient for obtaining DNA template from most  
212 insect specimens. In summary, obtaining DNA templates for barcoding is fast and  
213 straightforward and most published barcoding studies greatly overcomplicate this step. It  
214 should be noted however, that all DNA extraction methods require the removal of excess  
215 ethanol from specimens prior to extraction (e.g., by placing the specimen on tissue paper or  
216 replacing ethanol with water prior to specimen processing) and that the DNA extracts  
217 obtained with such methods should be stored at -20°C and be used within days.

218

219 Methods for step 2: amplifying *COI* via PCR. Most PCR recipes and reagents are optimized  
220 to work for a wide variety of genes and not just for a gene like the *COI* barcode that is  
221 naturally enriched, has a large number of known primers, and is fairly short. Standard PCR  
222 recipes can therefore be simplified. However, the use of “modern” sequencing technologies  
223 such as Illumina, PacBio, or Oxford Nanopore Technologies introduces one complication:

224 The amplicons have to be “tagged” (or “indexed”/“barcoded”). This is necessary because  
225 pools of amplicons are sequenced simultaneously instead of processing one amplicon at a  
226 time (as in Sanger sequencing). Tags are specimen identifiers consisting of short DNA  
227 sequences at the 5’ ends of the amplicons. They allow for the assignment of each sequence  
228 read obtained during sequencing to a specific specimen in the “demultiplexing”  
229 bioinformatics step. Numerous tagging techniques have been described in the literature, but  
230 most are too complicated for efficient DNA barcoding.

231

### 232 *Simplified techniques for obtaining tagged amplicons*

233 Published protocols tend to have five issues that increase workload and/or inflate cost, while  
234 a fifth issue only affects amplicon tagging:

- 235 • *Issue 1: expensive polymerases or master mixes.*

236 These often utilize high-fidelity polymerases that are designed for amplifying low copy-  
237 number nuclear genes based on low-concentration template but rarely make a difference  
238 when amplifying *COI*. Indeed, even home-made polymerases can be used for barcoding.  
239 This is important because high import taxes for consumables interfere with biodiversity  
240 discovery in many biodiverse countries.

- 241 • *Issue 2: indiscriminate use of single-use consumables.*

242 Disposable products increase costs and damage the environment. Most biodiversity  
243 samples are obtained under “unclean conditions” that create numerous opportunities for  
244 cross-specimen contamination long before specimens reach the lab (e.g., thousands of  
245 specimens rubbing against each other in sample containers and in the same  
246 preservation fluid). Yet numerous studies have shown that the DNA from specimens  
247 exposed to such conditions will usually outcompete contaminant DNA that is likely to  
248 occur at much lower concentrations. Similarly, the probability that a washed/flushed and  
249 autoclaved microplates or pipette tips retain enough viable contaminant DNA to  
250 successfully outcompete the template DNA is extremely low. Indeed, we have repeatedly  
251 tried and failed to amplify *COI* using reused plastic consumables and water as template.

252 That it is safe to reuse some consumables is again good news for biodiversity discovery  
253 under severe financial constraints. Note, however, that we do not recommend the re-use  
254 of consumables for handling stock chemicals such as primers and sequencing reagents.

255 • *Issue 3: large PCR volumes (25-50  $\mu$ l).*

256 Pools of tagged amplicons comprise hundreds or thousands of products and there is  
257 typically more than enough DNA for preparing a library. Accordingly, even small PCR  
258 volumes of 10-15  $\mu$ l are sufficient, thereby reducing consumable costs for PCR to nearly  
259 half when compared to standard volumes of 25-50  $\mu$ l.

260 • *Issue 4: using gel electrophoresis for checking amplification success of each PCR*  
261 *product.*

262 This time-consuming step is only justified when Sanger sequencing is used or when  
263 high-priority specimens are barcoded. It is not necessary when barcoding large numbers  
264 of specimens with modern sequencing technologies, because failed amplicons do not  
265 add to the sequencing cost. Furthermore, specimens that failed to yield barcodes during  
266 the first sequencing run can be re-sequenced or re-amplified and then added to  
267 subsequent sequencing runs (Srivathsan, Hartop et al. 2019). We thus only use gel  
268 electrophoresis to check a small number of reactions per microplate (N=8-12, including  
269 the negative control) in order to make sure that there was no plate-wide failure.

270

271 The fifth issue requires more elaboration and concerns how to efficiently tag amplicons. We  
272 tag via a single PCR reaction (Meier, Wong et al. 2016) using primers including the tag at  
273 the 5' end because it is simpler than the dual-PCR tagging strategy dominating the literature.  
274 The latter has numerous disadvantages when applied to one gene: it doubles the cost by  
275 requiring two rounds of PCR, is more labour intensive, increases the risk for PCR errors by  
276 requiring more cycles, and requires clean-up of every PCR product after the first round of  
277 amplification. In contrast, tagging via a single PCR is simple and costs the same as any  
278 gene amplification. It is here described for a microplate with 96 templates, but the protocol  
279 can be adapted to the use of strip tubes or half-plates. What is needed is a 96-well primer

280 plate where each well contains a differently tagged reverse primer. This “primer plate” can  
281 yield 96 unique combinations of primers once the 96 reverse primers are combined with the  
282 one forward primer (f-primer x 96 differently tagged r-primers = 96 unique combinations).  
283 This also means that if one purchases 105 differently tagged forward primers, one can  
284 individually tag 10,800 specimens (105 x 96= 10,800 amplicons). This is the number of  
285 amplicons that we consider appropriate for a MinION flow cell (R10.3; see below).

286

287 Assigning tag combinations is also straightforward. For each plate with 96 PCR reactions,  
288 add the same f-primer to a tube with the PCR master mix (Taq DNA polymerase, buffer and  
289 dNTPs) for the plate. Then dispense the “f-primed” master mix into the 96-wells. Afterwards,  
290 use a multichannel pipette to add the DNA template and the tagged r-primers from the r-  
291 primer plate into the PCR plate. All 96 samples in the plate now have a unique combination  
292 of tagged primers because they only share the same tagged forward primer. This makes the  
293 tracking of tag combinations simple because each PCR plate has its own tagged f-primer,  
294 while the r-primer is consistently tied to well position. Each plate has a negative control to  
295 ensure that no widespread contamination has occurred. The tagging information for each  
296 plate is recorded in the demultiplexing file that is later used to demultiplex the reads obtained  
297 during sequencing.

298

299 Some users may worry that the purchase of many primers is expensive, but one must keep  
300 in mind that the amount of primer used in a PCR reaction is constant. Therefore, single  
301 PCR-tagging only means a greater upfront investment. Ordering all primers at once,  
302 however, does mean that one must be much more careful about avoiding primer  
303 degeneration and contamination as the stock will last longer. Primer stock should be stored  
304 at -80°C and the number of freeze-thaw cycles should be kept low (<10). This means that  
305 upon receipt of the primer stock, it should be immediately aliquoted into plates/tubes holding  
306 only enough primer for rapid use. For fieldwork, one should only bring enough dissolved  
307 primer for the necessary experiments, or rely on lyophilised reagents.

308

309 The choice of tag length is determined by three factors. Longer tags reduce PCR success  
310 rates (Srivathsan, Hartop et al. 2019) while they increase the proportion of reads that can be  
311 assigned to a specific specimen (demultiplexing rate). Designing tags is not straightforward  
312 because they must remain sufficiently distinct (>4bp from each other including  
313 insertions/deletions) while avoiding homopolymers. We include a list of 13 bp tags that are  
314 suitable in supplementary materials.

315

316 Methods for step 3: Amplicon sequencing. The use of the PCR techniques described so far  
317 should keep the cost for a tagged barcode amplicon to 0.05-0.10 USD as long as the user  
318 buys cost-effective consumables. What comes next is the purification of the amplicons via  
319 the removal of unused PCR reagents, the adjustment of DNA concentration, and  
320 sequencing. Sequencing can be done with Sanger sequencing, Oxford Nanopore  
321 Technologies (ONT) (e.g., MinION: Srivathsan, Hartop et al. 2019), Illumina (Wang,  
322 Srivathsan et al. 2018), or PacBio (e.g., Sequel: Hebert, Braukmann et al. 2018). Users  
323 select the sequencing option that best suit their needs based on five major criteria: (1)  
324 Scaling; i.e., ability to accommodate projects of different sizes, (2) turnaround times, (3) cost,  
325 (4) amplicon length and (5) sequencing error rate. Sanger sequencing has fast turnaround  
326 times but high sequencing cost per amplicon (\$3-4 USD). This is the only method where cost  
327 scales linearly with the number of amplicons that need sequencing, while the other  
328 sequencing techniques are fundamentally different in that each run has two fixed costs that  
329 stay the same regardless of whether only a few or the maximum number of amplicons for the  
330 respective flow cells are sequenced. The fixed costs are library preparation (preparing  
331 amplicons for sequencing) and flow cell.

332

333 The MinION Flongle has the lowest fixed costs (library and flow cell: ca. \$140 USD) and we  
334 show here that it has sufficient capacity for ca. 250 barcodes. The turnaround time is fast, so  
335 the MinION Flongle is arguably the best sequencing option for small barcoding projects with

336 > 50 barcodes. Full MinION flow cells also have fast turnaround times, but the minimum run  
337 cost is ca. 1000 USD, so this option only becomes more cost-effective than Flongle when  
338 >1800 amplicons are sequenced. As shown later, one regular MinION flow cell can  
339 comfortably sequence 10,000 amplicons. This is a similar volume to what has been  
340 described for PacBio (Sequel) (Hebert, Braukmann et al. 2018), but the high instrument cost  
341 for PacBio means that sequencing usually has to be outsourced, leading to longer wait  
342 times. By far the most cost-effective sequencing method for barcodes is Illumina's NovaSeq  
343 sequencing. The fixed costs for library and lanes are high (3000-4000 USD), but each flow  
344 cell yields 800 million reads which can comfortably sequence 800,000 barcodes at a cost of  
345 < \$0.01 USD per barcode. This high capacity means that the 6 million publicly available  
346 barcodes in BOLD Systems could have been sequenced on just <8 NovaSeq flow cells for  
347 ~50,000 USD. However, Illumina sequencing can only be used for mini-barcodes of up to  
348 420 bp length (using 250bp PE sequencing using SP flow cell). "Full-length" *COI* barcode  
349 (658 bp) can only be obtained by sequencing two amplicons. Note that while Illumina  
350 barcodes are shorter than "full-length" barcodes, there is no evidence that mini-barcodes  
351 have a negative impact on species delimitation or identification as long as the mini-barcode  
352 is >250 bp in length (Yeo, Srivathsan et al. 2020).

353

354 *Simplified techniques for sequencing tagged amplicons:* Modern sequencing technologies  
355 are used to sequence amplicon pools instead of individual amplicons. To obtain such a pool,  
356 it is sufficient to combine only 1  $\mu$ l per PCR product. The pool can be cleaned using several  
357 PCR clean-up methods. We generally use SPRI bead-based clean-up, with Ampure  
358 (Beckman Coulter) beads but Kapa beads (Roche) or the more cost-effective Sera-Mag  
359 beads (GE Healthcare Life Sciences) in PEG (Rohland and Reich 2012) are also viable  
360 options (Srivathsan, Hartop et al. 2019). We recommend the use of a 0.5X ratio for Ampure  
361 beads for barcodes longer than 300 bp since it removes a larger proportion of primers and  
362 primer dimers. However, this ratio is only suitable if yield is not a concern (e.g., pools  
363 consisting of many and/or high concentration amplicons). Increasing the ratio to 0.7-1X will

364 improve yield but render the clean-up less effective. Amplicon pools containing large  
365 numbers of amplicons usually require multiple rounds of clean-up, but only a small subset of  
366 the entire pool needs to be purified because most library preparation kits require only small  
367 amounts of DNA. Note that the success of the clean-up procedures should be verified with  
368 gel electrophoresis, which should yield only one strong band of expected length. After the  
369 clean-up, the pooled DNA concentration is measured in order to use an appropriate amount  
370 of DNA for library preparation. Most laboratories use a Qubit, but less precise techniques are  
371 probably also suitable.

372

373 Obtaining a cleaned amplicon pool according to the outlined protocol is not time consuming.  
374 However, many studies retain “old Sanger sequencing habits”. For example, they use gel  
375 electrophoresis for each PCR reaction to test whether an amplicon has been obtained and  
376 then clean and measure all amplicons one at a time for normalization (often with very  
377 expensive techniques: Ampure beads: (Maestri, Cosentino et al. 2019); TapeStation,  
378 BioAnalyzer, Qubit: (Seah, Lim et al. 2020)). This is presumably done to obtain a pool of  
379 amplicons where each has equal representation. However, reads are cheap while individual  
380 clean-ups and measurements for each PCR product are expensive. Furthermore, weak  
381 products that failed to yield a barcode can be re-sequenced (Srivathsan, Hartop et al 2019)  
382 and PCR products can be normalized to a certain degree using gel electrophoresis for a  
383 handful of products per PCR microplate. Plates can then be classified as “strong”, “weak”, or  
384 “largely failed” and three amplicon pools can be prepared. The DNA contribution of each can  
385 be adjusted according to strength and the number amplicons in each pool. This was also the  
386 strategy adopted for the current study.

387

### 388 **3. MinION barcoding with new flow cells (R10.3, Flongle) and high-accuracy** 389 **basecalling**

390 Oxford Nanopore Technologies (ONT) instruments sequence DNA by passing single-  
391 stranded DNA through a nanopore. This creates current fluctuations which can be measured

392 and translated into a DNA sequence via basecalling (Wick 2019). The sequencing devices  
393 are small and inexpensive, but the read accuracy is only moderate (85% - 95%) (Wick 2019,  
394 Silvestre-Ryan and Holmes 2021). This means that data analysis requires specialized  
395 bioinformatics pipelines. The nanopores used for sequencing are arranged on flow cells, with  
396 new flow cell chemistries and basecalling softwares regularly released. Recently, three  
397 significant changes occurred. Firstly, ONT released a cheap flow cell (Flongle) that only has  
398 126 pores (126 channels) instead of the customary 2048 pores (512 channels) of a full  
399 MinION flow cell. We were interested in Flongle because it looked promising for small  
400 barcoding projects that needed quick turnaround times. Secondly, ONT released a new flow  
401 cell chemistry for full flowcells (R10.3) where the nanopores have a dual instead of a single  
402 reader-head. Dual reading has altered the read error profile by giving better resolution to  
403 homopolymers and improving consensus accuracy (Chang, Ip et al. 2020, Vereecke, Bokma  
404 et al. 2020). Lastly, ONT released high accuracy (HAC) basecalling. We thus obtained  
405 amplicons using techniques described in Section 2 and processed them further as described  
406 below.

407

408 Library preparation. Library preparation was based on 200 ng of DNA for the full MinION flow  
409 cells and 100 ng for the Flongle and used ligation-based kits(see Table 1 for details). We  
410 generally followed kit instructions, but excluded the FFPE DNA repair mix in the end-repair  
411 reaction, as this is mostly needed for formalin-fixed, paraffin-embedded samples. The  
412 reaction volumes for the R10.3 flow cell libraries consisted of 45  $\mu$ l of DNA, 7  $\mu$ l of Ultra II  
413 End-prep reaction buffer (New England Biolabs), 3  $\mu$ l of Ultra II End Prep Reaction Buffer  
414 (New England Biolabs) and 5  $\mu$ l of molecular grade water. For the Flongle, only half of the  
415 reagents were used to obtain a total volume of 30  $\mu$ l. We further modified the Ampure ratio  
416 to 1x for all steps as DNA barcodes are short whereas the recommended ratio in the manual  
417 is for longer DNA fragments. The libraries were loaded and sequenced with a MinION Mk  
418 1B. Data capture involved a MinIT or a Macintosh computer that meets the IT specifications



419 recommended by ONT. The bases were called using Guppy (versions provided in Table 2),  
420 under the high-accuracy model in MinIT taking advantage of its GPU.

421

422 Sequencing. Six amplicon pools were sequenced (Table 1). For two of the pools, *Mixed*  
423 *Diptera* (N=511) and *Afrotropical* (N=4,275) *Phoridae*, we had comparison barcodes that  
424 were obtained with Sanger and Illumina sequencing and the same amplicon pools were  
425 previously sequenced with earlier versions of MinION flow cells (Srivathsan, Baloglu et al.  
426 2018, Srivathsan, Hartop et al. 2019) (Table 1). These two pools were used to assess the  
427 accuracy of barcodes generated using R10.3 flow cells. Two additional datasets tested the  
428 capacity of R10.3 flowcells for mini- and full length barcodes for the same specimens  
429 (*Palearctic Phoridae*, 658 and 313 bp for ca. 9,930 specimens). The *Mixed Diptera*  
430 *Subsample* and *Chironomidae* datasets test the performance of the Flongle. The *Mixed*  
431 *Diptera Subsample* (N=257) is a subset of the *Mixed Diptera* (N=511) amplicon pool for  
432 which we have Sanger barcodes for comparison. The *Chironomidae* dataset contains  
433 sequences for 313 bp mini-barcodes for 191 specimens of Chironomidae that were newly  
434 amplified for this study.

435

436 **Table 1.** Datasets used in the study and the corresponding experimental details.

| <b>Dataset Name</b>                                                                           | <b>Number of specimens</b>                               | <b>Fragment size, primer information</b>                            | <b>Extraction/PCR setup</b>                                                                                                                                                                                | <b>PCR cleanup</b>                                  | <b>ONT Library Preparation kit/Flow cell used</b> |
|-----------------------------------------------------------------------------------------------|----------------------------------------------------------|---------------------------------------------------------------------|------------------------------------------------------------------------------------------------------------------------------------------------------------------------------------------------------------|-----------------------------------------------------|---------------------------------------------------|
| <b>R10.3 Datasets</b>                                                                         |                                                          |                                                                     |                                                                                                                                                                                                            |                                                     |                                                   |
| <u>Mixed Diptera</u> (see Srivathsan et al., 2018) - Sanger barcodes available                | 511 (257 mixed Diptera, 254 Dolichopodidae) 17 negatives | 658 bp HCO2198, LCO1490 (Folmer et al., 1994)                       | Extraction Method: QuickExtract<br>PCR Mix:<br>Total volume: 20 µl<br>10x buffer: 2 µl<br>dNTPs (2.5 mM): 1.5 µl<br>Taq polymerase: 0.2 µl<br>BSA (1 mg/ml): 2 µl<br>Primer (5 µM): 2 µl each<br>DNA: 2 µl | Ampure beads (Beckman Coulter)                      | SQK-LSK110/FLO-MIN111                             |
| <u>Afrotropical Phoridae</u> (see Srivathsan et al., 2019) - Illumina mini-barcodes available | 4275 (Phoridae) 45 negatives                             | 658 bp HCO2198, LCO1490 (Folmer et al., 1994)                       | Extraction Method: QuickExtract<br>PCR Mix:<br>Total volume: 15.16 µl<br>Mastermix (CWBio): 10 µl<br>25mM MgCl <sub>2</sub> : 0.16 µl<br>BSA (1 mg/ml): 2 µl<br>Primer (10µM): 1 µl each<br>DNA: 1 µl      | Sera-Mag beads (GE Healthcare Life Sciences) in PEG | SQK-LSK109/FLO-MIN111                             |
| <u>Palaeartic Phoridae (658)</u>                                                              | 9,929 (Phoridae) 105 negatives                           | 658 bp jgHCO2198, LCO1490 (Folmer et al., 1994, Geller et al. 2013) | Extraction Method: HotSHOT<br>PCR Mix:<br>Total volume: 16 µl<br>Mastermix (CWBio): 7 µl<br>BSA (1mg/ml): 1 µl<br>Primer (10µM): 1 µl each<br>DNA: 6 µl                                                    | Ampure beads (Beckman Coulter)                      | SQK-LSK110/FLO-MIN111                             |
| <u>Palaeartic Phoridae (313)</u>                                                              | 9,932 (Phoridae) 106 negatives                           | 313 bp m1COLintF, jgHCO2198 (Leray et al. 2013, Geller et al. 2013) | Extraction Method: HotSHOT<br>PCR Mix:<br>Total volume: 14 µl<br>Mastermix (CWBio): 7 µl<br>BSA (1mg/ml): 1 µl<br>Primer (10µM): 1 µl each<br>DNA: 4 µl                                                    | Ampure beads (Beckman Coulter)                      | SQK-LSK110/FLO-MIN111                             |
| <b>Flongle Datasets</b>                                                                       |                                                          |                                                                     |                                                                                                                                                                                                            |                                                     |                                                   |
| <u>Mixed Diptera subsample</u> (see Srivathsan et al., 2018) - Sanger barcodes available      | 257 7 negatives                                          | See "Mixed Diptera" entry for R10.3                                 | See "Mixed Diptera" entry for R10.3                                                                                                                                                                        | Ampure beads (Beckman Coulter)                      | SQK-LSK109/Flongle                                |
| <u>Chironomidae</u>                                                                           | 191 (Chironomidae) 1 negative                            | 313 bp m1COLintF, jgHCO2198 (Leray et al. 2013, Geller et al. 2013) | Extraction Method: HotSHOT<br>PCR Mix:<br>Total volume: 14 µl<br>Mastermix (CWBio): 7 µl<br>BSA (1 mg/ml): 1 µl<br>Primer (10µM): 1 µl each<br>DNA: 4 µl                                                   | Ampure beads (Beckman Coulter)                      | SQK-LSK109/Flongle                                |

437

438

439

440 Bioinformatics

441 One of the most significant barriers to widespread barcoding with MinION is the high error  
442 rates of ONT reads. In 2018, we developed a bioinformatics pipeline for error correction that  
443 was too complex for the average user (Srivathsan, Baloglu et al. 2018, Srivathsan, Hartop et  
444 al. 2019). After obtaining data with several R10.3 and new R9.4 flow cells, we initially applied  
445 this pipeline (Srivathsan et al. 2019), but we noticed major improvements in terms of MinION  
446 read quality and the total number of raw and demultiplexed reads produced by each flow  
447 cell. This led to the development of a new user-friendly pipeline after considering alternative,  
448 published pipelines which faced one or several of the following problems: they required high  
449 read coverage, relied on external sequences, were complex, and/or needed several  
450 command line steps, and included external dependencies that limit cross platform  
451 compatibility (Menegon, Cantaloni et al. 2017, Maestri, Cosetino et al. 2019, Seah, Lim et al.  
452 2020, Sahlin, Lim et al. 2021). We here present “ONTbarcoder”, which has a graphical user  
453 interface (GUI) and is suitable for all major operating systems (Linux, Mac OS, Windows10).  
454 Both are requirements for the democratization of barcoding with MinION. In addition, we  
455 prepared a simple video tutorial  
456 (<https://www.youtube.com/channel/UC1WowokomhQJRc71FmsUAcg>).

457

458 ONTbarcoder. ONTbarcoder (available at: <https://github.com/asrivathsan/ONTbarcoder>) has  
459 three modules. (a) The first is a demultiplexing module which assigns reads to specimen-  
460 specific bins. (b) The second is a barcode calling module which reconstructs the barcodes  
461 based on the reads in each specimen bin. (c) The third is a barcode comparison module that  
462 allows for comparing barcodes obtained via different software and software settings.

463

464 a. Demultiplexing. The user provides three pieces of information and two files: (1) primer  
465 sequence, (2) expected fragment length, and (3) demultiplexing information (=tag  
466 combination for each specimen). The latter is summarized in a demultiplexing file (see  
467 supplementary information for format). The only other required file is the FASTQ file

468 obtained from MinKNOW/Guppy after basecalling. Demultiplexing by ONTbarcode starts by  
469 analyzing the read length distribution in the FASTQ file. Only those reads that meet the read  
470 length threshold are demultiplexed (default= 658 bp corresponding to metazoan COI  
471 barcode). Technically, the threshold should be the amplicon length plus the length of both  
472 tagged primers, but ONT reads have indel errors such that they are occasionally too short  
473 and we therefore advise to specify the amplicon length as threshold. Reads that are twice  
474 the expected fragment length are split into two parts. Splitting is based on the user given  
475 fragment size, primer and tag lengths, and a window size to account for indel errors  
476 (default=100 bp).

477

478 Once all reads suitable for demultiplexing have been identified, ONTbarcode finds the  
479 primers via sequence alignment of the primer sequence to the reads (using python library  
480 *edlib*). Up to 10 deviations from the primer sequence are allowed because this step is only  
481 needed for determining the primer location and orientation within the read. For  
482 demultiplexing, the flanking region of the primer sequence is retrieved whereby the number  
483 of retrieved bases is equal to the user-specified tag length. The flanking sequences are then  
484 matched against the tags from the user-provided tag combinations (demultiplexing file). In  
485 order to account for sequencing errors, not only exact matches are accepted, but also  
486 matches to “tag variants” that differ by up to 2 bps from the original tag  
487 (substitutions/insertions/deletions). Note that accepting tag variants does not lead to  
488 demultiplexing error because all tags differ by >4 bp. All reads thus identified as belonging to  
489 the same specimen are pooled into the same bin. To increase efficiency, demultiplexing is  
490 parallelized and the search space for primers and tags are restricted to user-specified parts  
491 of each read.

492

493 **b. Barcode calling:** Barcode calling uses the reads within each specimen-specific bin to  
494 reconstruct the barcode sequence. The reads are aligned to each other and a consensus  
495 sequence is called. Barcode calling is done in three phases: “Consensus by Length”,

496 “Consensus by Similarity” and “Consensus by barcode comparison”. The user can opt to  
497 only use some of these methods.

498

499 “Consensus by Length” is the main barcode calling mode. Alignment must be efficient in  
500 order to obtain high-quality barcodes at reasonable speed for thousands of amplicons.  
501 ONTbarcoder delivers speed by using an iterative approach that gradually increases the  
502 number of reads (“coverage”) that is used during alignment. However, reconstructing  
503 barcodes based on few reads could lead to errors which are here weeded out by using four  
504 Quality Control (QC) criteria. The first three QC criteria are applied immediately after the  
505 consensus sequence has been called: (1) the barcode must be translatable, (2) it has to  
506 match the user-specified barcode length, and (3) the barcode has to be free of ambiguous  
507 bases (“N”). To increase the chance of finding a barcode that meets all three criteria, we  
508 subsample the reads in each bin by read length (thus the name “Consensus by Length”);  
509 i.e., initially only those reads closest to the expected length of the barcode are used. For  
510 example, if the user specified coverage=25x for a 658 bp barcode, ONTbarcoder would only  
511 use the 25 reads that have the closest match to 658 bp. The fourth QC measure is only  
512 applied to barcodes that have already met the first three QC criteria. A multiple sequence  
513 alignment (MSA) is built for the barcodes obtained from the amplicon pool, and any barcode  
514 that causes the insertion of gaps in the MSA is rejected. Note that if the user suspects that  
515 barcodes of different length are in the amplicon pool, the initial analysis should use the  
516 dominant barcode length. The remaining barcodes can then be recovered by re-analyzing all  
517 data or only the failed read bins (“remaining”, see below) and bins that yielded barcodes that  
518 had to be “fixed”. These bins can be reanalyzed using a different pre-set barcode length.

519

520 “Consensus by Similarity”. The barcodes that failed the QC during the “Consensus by  
521 Length” stage are often close to the expected length and have few ambiguous bases, and/or  
522 cause few gaps in the MSA. These “preliminary barcodes” can be improved through  
523 “Consensus by Similarity”. This method eliminates outlier reads from the read alignments.

524 Such reads often differ considerably from the signal of the consensus barcode and  
525 ONTbarcoder identifies them by sorting all reads by similarity to the preliminary barcode.  
526 Only the top 100 reads (this default can be changed) that differ by <10% from the  
527 preliminary barcode are retained and used for calling the barcodes again using the same  
528 techniques described previously (including the same QC criteria). This distance threshold  
529 accounts for errors generated by MinION but excludes highly erroneous or contaminating  
530 reads. This improvement step converts many preliminary barcodes found during “Consensus  
531 by Length” into barcodes that pass all four QC criteria by filling/removing indels or resolving  
532 an ambiguous base.

533

534 “Consensus by barcode comparison”. The remaining preliminary barcodes that still failed to  
535 convert into QC-compliant barcodes tend to be based on read bins with low coverage, but  
536 some can yield good barcodes after subjecting them to a further improvement step that fixes  
537 the remaining errors. ONTbarcoder identifies these errors by finding the 20 most similar QC-  
538 compliant barcodes that have already been reconstructed for the other amplicons. The 21  
539 sequences are aligned and ONTbarcoder finds the errors because they cause insertions and  
540 deletions in the MSA. Insertions are deleted, gaps are filled with ambiguous bases (“N”), but  
541 mismatches are retained. The number and kinds of “fixes” are recorded and added to the  
542 FASTA header of the barcode.

543

544 Output. ONTbarcoder extensively documents the barcoding results so that users can check  
545 the output and potentially modify the barcode calling parameters. For example, it produces a  
546 summary table (Outputtable.csv) and FASTA files that contain the different classes of  
547 barcodes. Each barcode header contains information on coverage used for barcode calling,  
548 coverage of the specimen bin, length of the barcode, number of ambiguities and number of  
549 indels fixed. Five sets of barcodes are provided, here discussed in the order of barcode  
550 quality: (1) “QC\_compliant”: The barcodes in this set satisfy all four QC criteria without  
551 correction and are the highest quality barcodes. (2) “Filtered\_barcodes”: this file contains the

552 barcodes that are translatable, have <1% ambiguities and have up to 5 indels fixed during  
553 the last step of the bioinformatics pipeline. These filtering thresholds were calibrated based  
554 on two datasets for which we have Sanger/Illumina barcodes and the resulting barcodes are  
555 found to be highly accurate. Note that the file with filtered barcodes also includes the  
556 QC\_compliant barcodes and that all results discussed in this manuscript are based on  
557 filtered barcodes given that they are of much higher quality than the average barcode in  
558 BOLDSystems (assessment in Srivathsan, Baloglu et al 2018).

559

560 The remaining files include barcodes of lesser and/or suspect quality. (3)

561 “Fixed\_barcodes\_XtoY”: these files contain barcodes that had indel errors fixed and are  
562 grouped by the number of errors fixed. Only the barcodes with 1-5 errors overlap with  
563 Filtered barcodes file, if they have <1% ambiguities. (4) “Allbarcodes”: this file contains all  
564 barcodes in sets (1)-(3). (5) “Remaining”: these are barcodes that fail to either translate or  
565 are not of predicted length. Note that all barcodes should be checked via BLAST against  
566 comprehensive databases in order to detect contamination. There are several online tools  
567 available for this and we recommend the use of GBIF sequence ID tool  
568 (<https://www.gbif.org/tools/sequence-id>) which gives straightforward output including a  
569 taxonomic summary.

570

571 The output folder also includes the FASTA files that were used for alignment and barcode  
572 calling. The raw read bins are in the “demultiplexed” folder, while the resampled bins (by  
573 length, coverage, and similarity) are in their respective subfolders named after the search  
574 step. Note that the raw reads are encoded to contain information on the orientation of the  
575 sequence and thus cannot be directly used in other software without modifications (see  
576 ONTbarcoder manual on Github). Lastly, for each barcode FASTA file (1-5), there are  
577 folders with the files that were used to call the barcodes. This means that the user can, for  
578 example, reanalyze those bins that yielded barcodes with high numbers of ambiguous

579 bases. Lastly a “runsummary.xlsx” document allows the user to explore the details of the  
580 barcodes obtained at every step of the pipeline.

581 Algorithms. ONTbarcoder uses the following published algorithms. All alignments utilize  
582 MAFFTv7 (Kato and Standley 2013). The MSAs that use MinION reads to form a  
583 consensus barcode are constructed in an approach similar to lamassemble (Frith,  
584 Mitsuhashi et al. 2020), using parameters optimized for nanopore data by “last-train”  
585 (Hamada, Ono et al. 2017) which accounts for strand specific error biases. The MAFFT  
586 parameters can be modified in the “parfile” supplied with the software which will help with  
587 adjusting the values given the rapidly changing nanopore technology. All remaining MSAs in  
588 the pipeline (e.g., of preliminary barcodes) use MAFFT’s default settings. All read and  
589 sequence similarities are determined with the *edlib* python library under the Needle-Wunsch  
590 (“NW”) setting, while primer search is using the infix options (“HW”). All consensus  
591 sequences are called from within the software. This is initially done based on a minimum  
592 frequency of 0.3 for each position. This threshold was empirically determined based on  
593 datasets where MinION barcodes can be compared to Sanger/Illumina barcodes. The  
594 threshold is applied as follows. All sites where >70% of the reads have a gap are deleted.  
595 For the remaining sites, ONTbarcoder accepts those consensus bases that are found in at  
596 least >30% of the reads. If no base/multiple bases reach this threshold, an “N” is inserted.  
597 To avoid reliance on a single threshold, ONTbarcoder allows the user to change the  
598 consensus calling threshold from 0.2 to 0.5 for all barcodes that fail the QC criteria at 0.3  
599 frequency. However, barcodes called at different frequencies are only accepted if they pass  
600 the first three QC criteria and are identical. If no such barcode is found, the 0.3 frequency  
601 consensus barcode is used for further processing.

602

603 c. Barcode comparison. Many users may want to call their barcodes under different settings  
604 and then compare barcode sets. The ONTbarcoder GUI simplifies such comparisons. A set  
605 of barcodes is dragged into the window and the user can select a barcode set as the  
606 reference. The barcode comparisons are conducted using *edlib* library. The barcodes in the



607 sets are compared and classified into three categories: “identical” where sequences are a  
608 perfect match and lack ambiguities, “compatible” where the sequences only differ by  
609 ambiguities, and “incorrect” where the sequences differ by at least one base pair. Several  
610 output files are provided. A summary sheet, a FASTA file each for “identical”, “compatible”,  
611 and the sequences only found in one dataset. Lastly, there is a folder with FASTA files  
612 containing the different barcodes for each incompatible set of sequences. This module can  
613 be used for either comparing set(s) of barcodes to reference sequences, or for comparing  
614 barcode sets against each other. It furthermore allows for pairwise comparisons and  
615 comparisons of multiple sets in an all-vs-all manner. This module was used here to get the  
616 final accuracy values presented in Table 3.

617

#### 618 **4. Performance of flow cells (R10.3, Flongle) and high-accuracy basecalling**

619 The pools used to test the new ONT products contained amplicons for 191 - 9,932  
620 specimens and were run for 15-49 hours (Table 2). The fast5 files were basecalled using  
621 Guppy in MinIT under the high accuracy (HAC) model. Basecalling large datasets under  
622 HAC is currently still very slow and took 12 days in MinIT for the *Palaeartic Phoridae* (658  
623 bp) dataset (Table 2) but the reads yielded high demultiplexing rates for three of the four  
624 R10.3 MinION datasets (= 30-49%). The exception was the *Palaeartic Phoridae* (313 bp)  
625 dataset (15.5%). Flongle datasets showed overall also lower demultiplexing rates (17-21%).

626

627 **Table 2.** Datasets generated in this study and the results of barcoding using ONTbarcoder at  
 628 200X coverage (Consensus by Length) and 100X coverage (Consensus by Similarity).  
 629

| <u>Dataset Name</u>                        | <u>Flow cell details<br/>Run time/Guppy<br/>version</u>                                                                             | <u>Raw reads/reads passing<br/>length threshold/reads of<br/>suitable length/<br/>demultiplexed</u> | <u>Demultiplexing<br/>rate/#<br/>QC compliant<br/>barcodes /#<br/>Filtered barcodes<br/>with 1N/# Filtered<br/>barcodes with &gt;1N<br/>/# Unreliable<br/>barcodes</u> |
|--------------------------------------------|-------------------------------------------------------------------------------------------------------------------------------------|-----------------------------------------------------------------------------------------------------|------------------------------------------------------------------------------------------------------------------------------------------------------------------------|
| <b>MinION R10.3 Datasets</b>               |                                                                                                                                     |                                                                                                     |                                                                                                                                                                        |
| Mixed Diptera<br>(658 bp, N=511)           | R10.3: reused flow cell:<br>71 pores according to<br>QC, but 500+ active<br>during run<br>Runtime: 27.5 hrs<br>Guppy: 4.2.3+f90bd04 | 3,864,000/3,425,357/3,560<br>,389/1,544,758                                                         | 43.39%/495/2/5/8<br>Total success rate=<br>502/511 (98.2%)                                                                                                             |
| Afrotropical Phoridae<br>(658 bp, N=4,275) | R10.3: new flow cell:<br>QC: 1,101 pores<br>Runtime: 49.5 hrs<br>Guppy: 4.0.11+f1071ce                                              | 6,838,903/5,465,164/5,474<br>,306/2,681,029                                                         | 48.97%/3,725/121/5<br>9/247<br>Total success rate=<br>3905/4275 (91.3%)                                                                                                |
| Palaeartic Phoridae<br>(658 bp, N=9,932)   | R10.3: new flow cell:<br>QC: 1,239 pores<br>Runtime: 47.5 hrs<br>Guppy: 4.2.3+f90bd04                                               | 16,595,984/15,658,174/16,<br>100,505/5,012,489                                                      | 31.13%/8,026/108/2<br>31/780<br>Total success rate=<br>8,365/9,932 (84.2%)                                                                                             |
| Palaeartic Phoridae<br>(313 bp, N=9,929)   | R10.3: new flow cell:<br>QC: 1,297 pores<br>Runtime: 37 hrs<br>Guppy: 4.2.3+f90bd04                                                 | 13,690,869/13,221,764/10,<br>366,455/12,983,260/2,015,<br>135                                       | 15.52%/8,705/118/1<br>12/899<br>Total success rate=<br>8,935/9,929 (90%)                                                                                               |
| <b>Flongle Datasets</b>                    |                                                                                                                                     |                                                                                                     |                                                                                                                                                                        |
| Mixed Diptera Subsample<br>(658 bp, N=257) | Flongle: new<br>QC: 81 pores<br>Runtime: 24 hrs<br>Guppy: v 4.0.11+f1071ce                                                          | 294,896/222,189/190,952/<br>33,270                                                                  | 17.42%/185/35/20/9<br>Total success rate=<br>240/257 (93.4%)                                                                                                           |
| Chironomidae<br>(313 bp, N=191)            | Flongle: new<br>QC: 74 pores<br>Runtime: 15 hrs<br>Guppy: 4.2.3+f90bd04                                                             | 560,062/525,087/504,621/<br>108,574                                                                 | 21.52%/178/1/2/6<br>Total success rate=<br>181/191 (94.8%)                                                                                                             |

630

631 We used ONTbarcoder to analyze the MinION data for all six datasets by analyzing all  
 632 specimen-specific read bins at different coverages (5-200x in steps of 5x). This means that  
 633 the barcodes for a bin with 27 reads were called five times at 5x, 10x, 15x, 20x, and 25x  
 634 coverages while bins with >200x were analyzed 40 times at 5x increments. Instead of using  
 635 conventional rarefaction via random subsampling reads, we used the first reads provided by

636 the flow cell because this accurately reflects how the data accumulated during the  
637 sequencing run and how many barcodes would have been obtained if the run had been  
638 stopped early. This rarefaction approach also allowed for mapping the barcode success  
639 rates against either coverage or time.

640

641 In order to obtain a “best” estimate for how many barcodes can be obtained, we also carried  
642 out one analysis at 200x coverage with the maximum number of “Comparison by Similarity”  
643 reads set to 100. This means that ONTbarcoder selected up to 200 reads from the  
644 specimen-specific read bin that had the closest match to the length of the target barcode  
645 (i.e., 313 or 658 bp), then produced an MSA and consensus barcode using MAFFT. If the  
646 resulting consensus barcode did not satisfy all four QC criteria, ONTbarcoder would select  
647 up to 100 reads that had at least a 90% match to the preliminary barcode. These reads  
648 would then be used to call another barcode with MAFFT. Only if this also failed to produce a  
649 QC-compliant barcode, ONTbarcoder would “fix” the preliminary barcode using its 20 closest  
650 matches in the dataset. All analyses produced a “filtered” set of barcodes (barcodes with  
651 <1% Ns and up to 5 fixes) that were used for assessing the accuracy and quality via  
652 comparison with Sanger and Illumina barcodes for *Mixed Diptera (MinION R10.3)*,  
653 *Afrotropical Phoridae (MinION R10.3)*, and *Mixed Diptera Subsample (Flongle R9.4)*. For the  
654 comparisons of the barcode sets obtained at the various coverages, we used MAFFT and  
655 the `assess_corrected_barcode.py` script in miniBarcoder (Srivathsan et al., 2019).

656

657 We investigated barcode accuracy (Figure 1) by directly aligning the MinION barcodes with  
658 the corresponding Sanger and Illumina barcodes. We find that MinION barcodes are virtually  
659 identical to Sanger and Illumina barcodes (>99.99% identity, Table 3). We then established  
660 that the number of ambiguous bases (“N”) is also very low for barcodes obtained with R10.3  
661 (<0.01%). Indeed, more than 90% of all barcodes are entirely free of ambiguous bases. In  
662 comparison, Flongle barcodes have a slightly higher proportion of ambiguous bases  
663 (<0.06%). They are concentrated in ~20% of all sequences so that 80% of all barcodes

664 again lack Ns. This means that MinION barcodes more than just match the Consortium for  
665 the Barcode of Life (CBOL) criteria for “barcode” designation with regard to length, accuracy,  
666 and ambiguity.

667

668 Rarefaction at different read coverage levels reveals that 80-90% of high-quality barcodes  
669 are obtained within a few hours of sequencing. In addition, the number of barcodes  
670 generated by MinION exceeded or was comparable to what could be obtained with Sanger  
671 or Illumina sequencing (Figure 1). We then determined the coverage needed for obtaining  
672 reliable barcodes. For this purpose, we plotted the number of barcodes obtained against  
673 coverage (Figure 2). This revealed that the vast majority of specimen bins yield high-quality  
674 barcodes at coverages between 25x and 50x when R10.3 reads are used. Increasing  
675 coverage beyond 50x leads to only modest improvements of quality and few additional  
676 specimen amplicons yield new barcodes. The coverage needed for obtaining Flongle  
677 barcodes is somewhat higher, but the main difference between the R9.4 technology of the  
678 Flongle flow cell and R10.3 is that more barcodes retain ambiguous bases even at high  
679 coverage for data from R9.4 flow cells. The differences in read quality between R9.4 and  
680 R10.3 become even more obvious when the read bins for the “Mixed Diptera Subsample”  
681 are analyzed based an identical numbers of R10.3 and R9.4 reads. The barcodes based on  
682 Flongle and R10.3 data are compatible, but the R10.3 barcodes are ambiguity-free while  
683 some of the corresponding Flongle barcodes retain 1-2 ambiguous bases.

684

685 Overall, these results imply that 100x raw read coverage is sufficient for obtaining barcodes  
686 with either R10.3 or R9.4 flow cells. Given that most MinION flow cells yield >10 million  
687 reads of an appropriate length, this means that one could, in principle, obtain 100,000  
688 barcodes in one flow cell. However, this would require that all amplicons are represented by  
689 similar numbers of copies and that all reads could be correctly demultiplexed. In reality, only  
690 30-50% of the reads can be demultiplexed and the number of reads per amplicon fluctuates  
691 widely (Figure 3). Very-low coverage bins tend to yield no barcodes or barcodes of lower

692 quality (errors or Ns). These low-coverage barcodes can be improved by collecting more  
693 data, but this comes at a high cost and increased risk of a small number of contaminant  
694 reads yielding barcodes. For example, we observed that some “negative” PCR controls  
695 yielded low-quality barcodes for 4 of 106 negatives in the Palaeartic Phoridae (313 bp) and  
696 1 of 105 negatives in the Palaeartic Phoridae (658 bp) datasets.

697

698 To facilitate the planning of barcode projects, we illustrate the trade-offs between barcode  
699 yield, time, and amount of raw data needed for six amplicon pools (Figure 4: 191-9,932  
700 specimens). These standard curves can be used to roughly estimate the amount of raw  
701 reads needed to achieve a specific goal for a barcoding project of a specific size (e.g.,  
702 obtaining 80% of all barcodes for a project with 1000 amplicons). For each dataset, we  
703 illustrate how many reads were needed to recover a certain proportion of barcodes. The  
704 number of recoverable barcodes was set to the number of all error-free, filtered barcodes  
705 obtained in an analysis of all data. We would argue that this is a realistic estimate of  
706 recoverable barcodes given the saturation plots in Figure 1 that suggest that most barcodes  
707 with significant amounts of data have been called at 200x coverage. Note, however, that  
708 Figure 4 can only provide very rough guidance on how many reads are needed because, for  
709 example, the demultiplexing rates differ between flow cells and different amplicon pools have  
710 very different read abundance distributions (see Figure 3).

711

712 **Table 3.** Quality assessment of barcodes generated by ONTbarcoder at 200X read  
713 coverage (Consensus by Length) and 100X coverage (Consensus by Similarity). The  
714 accuracy of MinION barcodes is compared with the barcodes obtained for the same  
715 specimens using Illumina/Sanger sequencing. Errors are defined as sum of substitution or  
716 indel errors. All denominators for calculating percentages are the total number of nucleotides  
717 assessed.  
718

| <b>Dataset</b>                                             | <b>No. of comparison barcodes</b> | <b>No. of barcodes with errors/No. of errors/% identity</b> | <b># of Ns/%Ns</b> |
|------------------------------------------------------------|-----------------------------------|-------------------------------------------------------------|--------------------|
| R10.3: Mixed Diptera: Sanger barcodes available            | 476                               | 2/10/99.997%                                                | 19 (0.006%)        |
| R10.3: Afrotropical Phoridae: Illumina barcodes available* | 3316                              | 23/48/99.995%                                               | 284 (0.011%)       |
| Flongle-Mixed Diptera Subsample: Sanger barcodes available | 231                               | 5/8/99.994%                                                 | 91 (0.058%)        |

719  
720 \*5 barcodes with very high distances from reference were excluded for R10.3: Afrotropical Phoridae dataset as  
721 they likely represent lab contamination (see Srivathsan, Hartop et al. (2019).

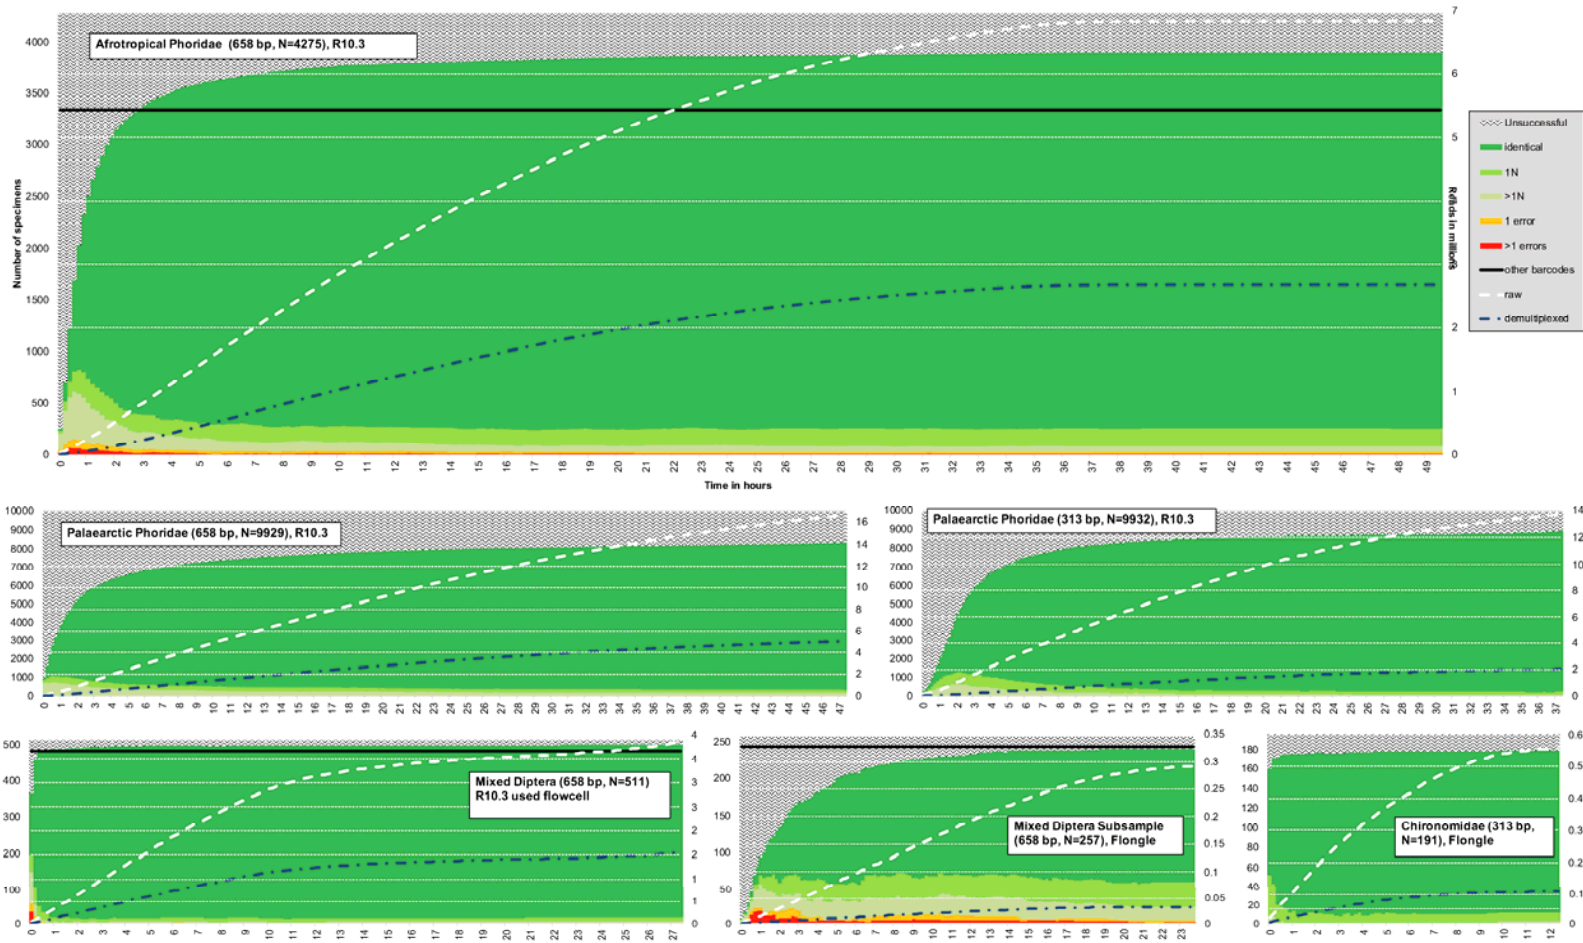

Figure 1. Rapid recovery of accurate MinION barcodes over time (in hours, x-axis) (filtered barcodes: dark green = barcodes passing all 4 QC criteria, light green = one ambiguous base; lighter green = more than 1N, no barcode = white with pattern, 1 mismatch = orange, >1 mismatch = red). The solid black line represents the number of barcodes available for comparison. White dotted line represents the amount of raw reads collected over time, blue represents number of demultiplexed reads over time (plotted against Z-axis)

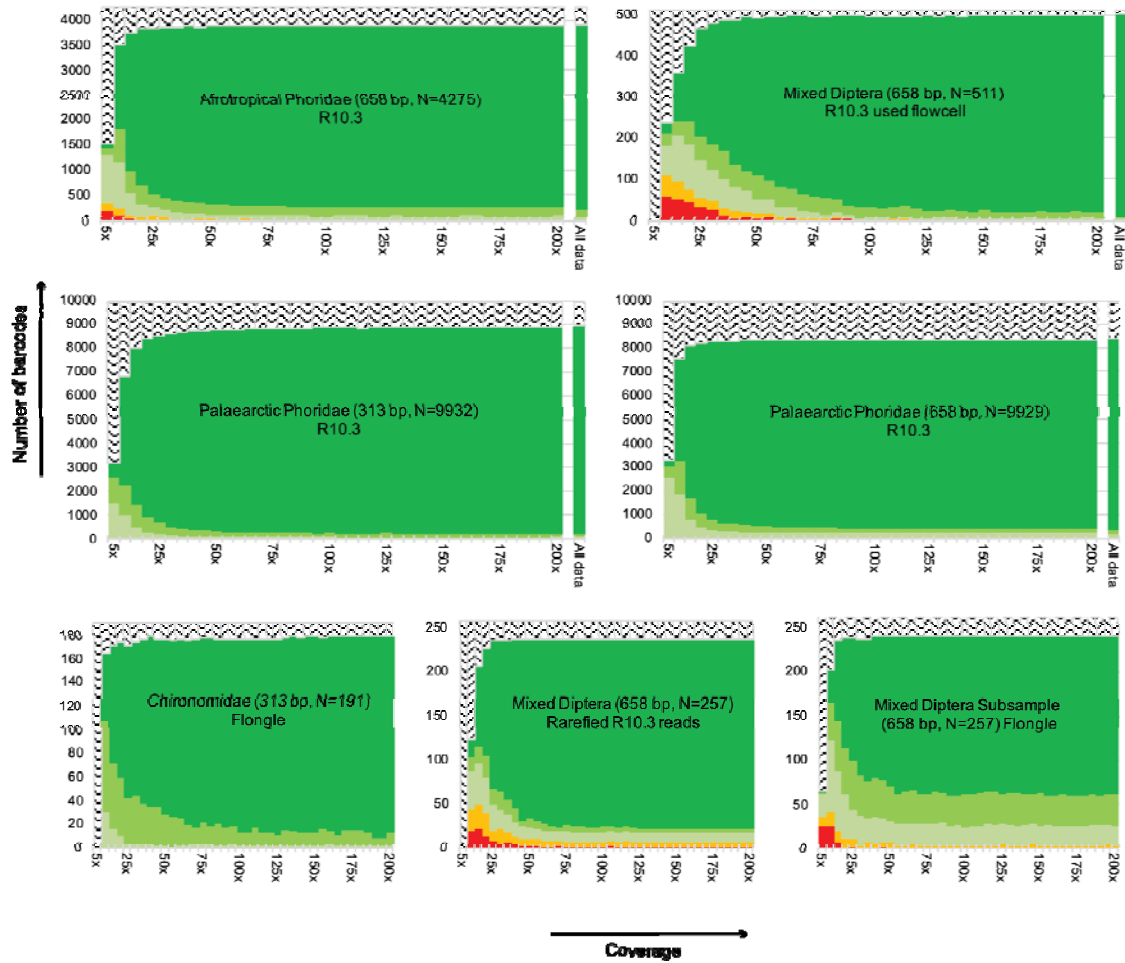

Figure 2. Relationship between barcode quality and coverage. Subsetting the data to 5-200X coverage shows that there are very minor gains to barcode quality after 25-50X coverage. (filtered barcodes: dark green = barcodes passing all 4 QC criteria, light green = one ambiguous base; lighter green = more than 1N, no barcode = white with pattern, 1 mismatch = orange, >1 mismatch = red).



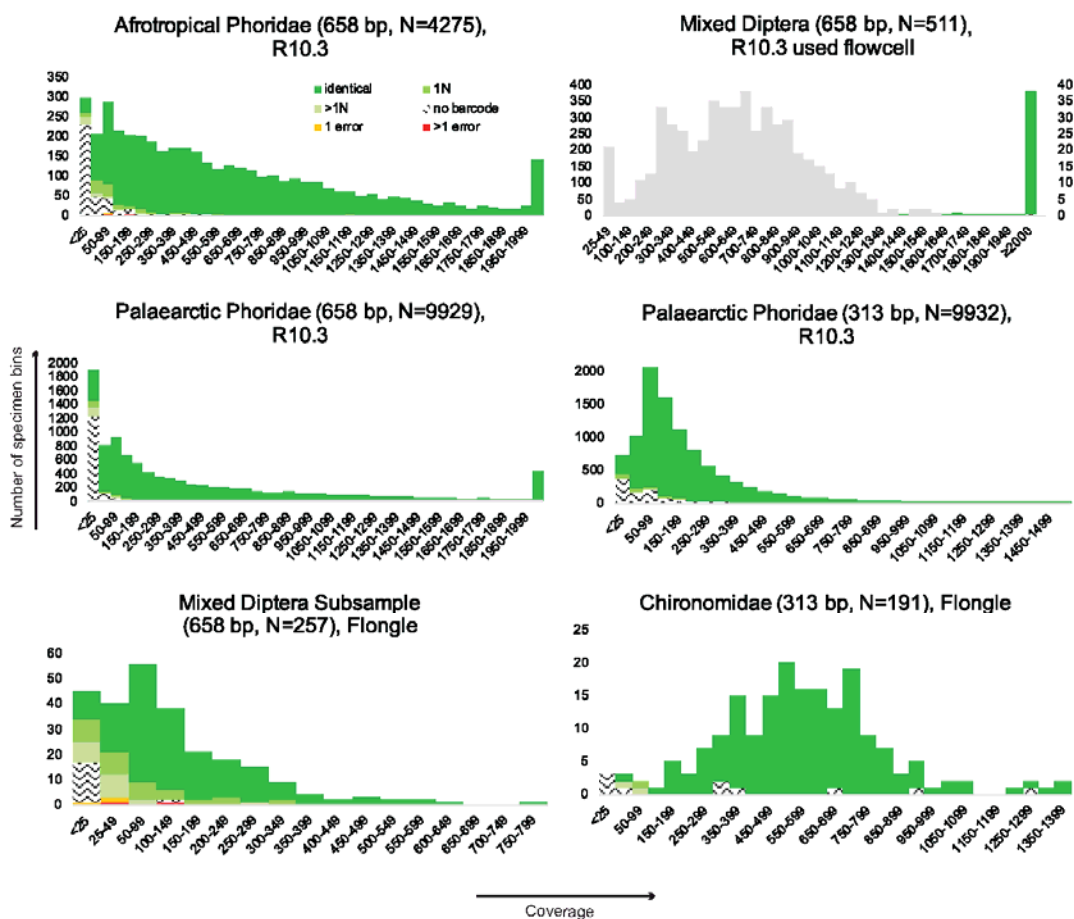

Figure 3. Read bin size distribution for six amplicon pools (color-coding as in Figs 1-2). Due to the very generous coverage for the “Mixed Diptera” dataset, we also use grey to show the bin size distribution after dividing the bin read totals by 5.

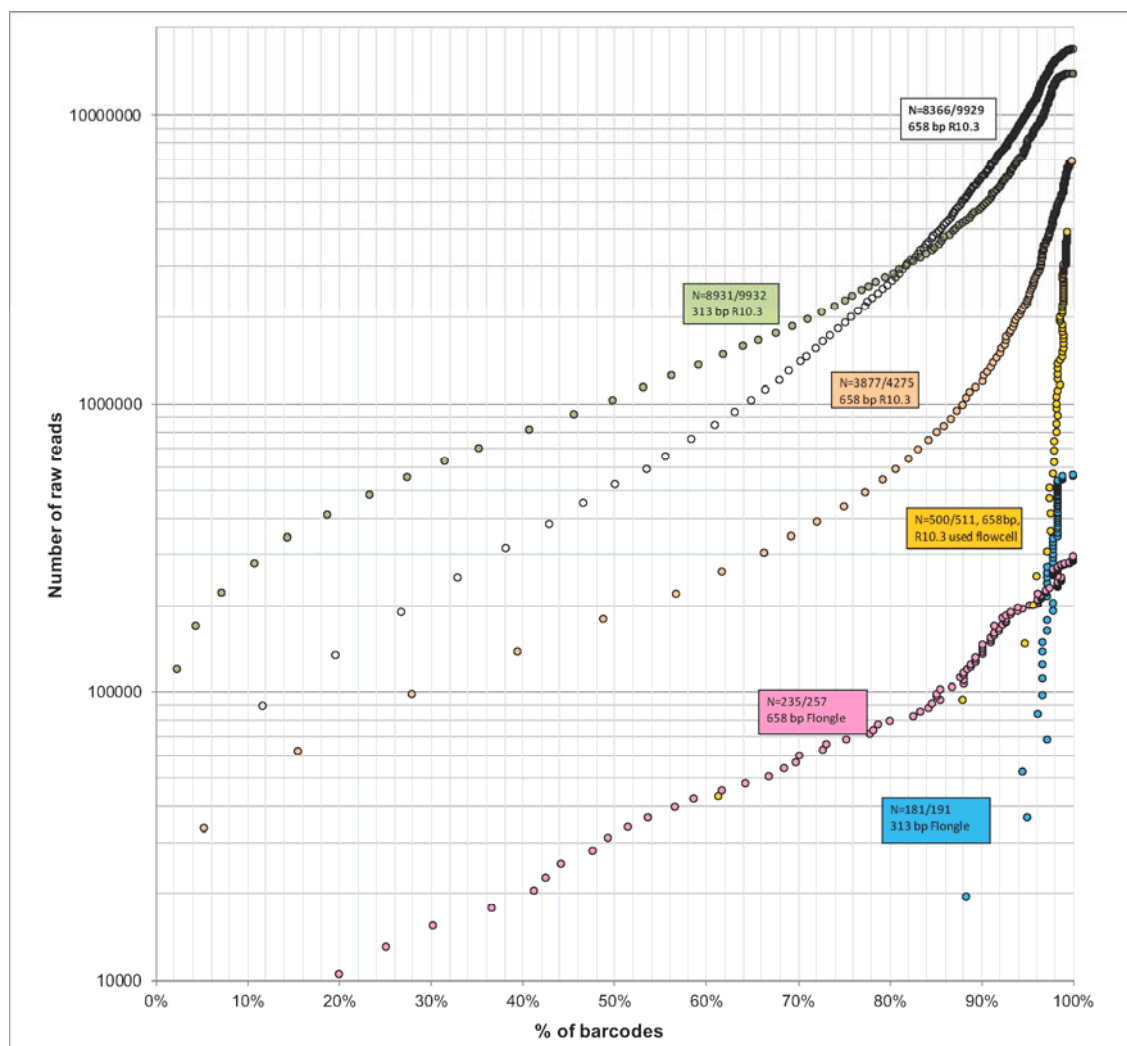

Figure 4. Relationship between barcoding success and number of raw reads for six amplicon pools (191-9932 specimens; barcoding success rates 84-97%). Percentage of barcodes recovered is relative to the final estimate based on all data.

722 **Discussion**

723 *Democratization of Barcoding*

724 Biodiversity research needs new scalable techniques for large-scale species discovery and  
725 monitoring. This task is particularly urgent and challenging for invertebrates that collectively  
726 make up most of the terrestrial animal biomass. We argued earlier that this is likely to be a  
727 task that requires the processing of at least 500 million specimens from all over the world  
728 with many tropical countries with limited research funding requiring much of the biodiversity  
729 discovery work. Pre-sorting these specimens into putative species-level units with DNA  
730 sequences is a promising solution as long as obtaining and analyzing the data are  
731 sufficiently straightforward and cost-effective. We believe that the techniques described in  
732 this manuscript will help with achieving these goals. Generating DNA barcodes involves  
733 three steps. The first is obtaining a DNA template, and we have herein outlined some  
734 simplified procedures that render this process essentially free-of-cost, although automation  
735 and AI-based solutions will be useful for processing very large numbers of specimens in  
736 countries with high manpower cost. The third step is the sequencing of the amplicon.  
737 Fortunately, there are now several cost-effective solutions based on 2<sup>nd</sup> and 3<sup>rd</sup> generation  
738 sequencing technologies so that barcodes can be sequenced for as little as a penny (USD).

739

740 We here argue that sequencing with MinION is particularly attractive although the cost is  
741 higher (0.10 USD) than with Illumina sequencing. There are several reasons. MinION library  
742 preparation can be learned within hours and an automated library preparation instrument is  
743 in development that will eventually work for ligation-based libraries. Furthermore, MinION  
744 flow cells can accommodate projects of varying scales. Flongle can be used for amplicon  
745 pools with a few hundred products, while an R10.3 flow cell can accommodate projects with  
746 up to 10,000 specimens. The collection of data on MinION flow cells can be stopped  
747 whenever enough have been acquired. Flow cells can then be washed and re-used again  
748 although the remaining capacity declines over time because some nanopores will become  
749 unavailable. We have re-used flow cells up to four times. Traditionally, the main obstacles to

750 using MinION have been poor read quality and high cost. Both issues are fading into the  
751 past. The quality of MinION reads has improved to such a degree that the laptop-version of  
752 our new software “ONTbarcoder” can generate thousands of very high quality barcodes  
753 within hours. There is no longer a need to polish reads or rely on external data or algorithms.  
754 The greater ease with which MinION barcodes can be obtained is due to several factors.  
755 Firstly, much larger numbers of reads can now be obtained with one MinION flow cell.  
756 Secondly, R10.3 reads have a different error profile which allows for reconstructing higher-  
757 quality barcodes. Thirdly, high accuracy basecalling has improved raw read quality and thus  
758 demultiplexing rates. Lastly, we can now use parameter settings for MAFFT that are  
759 designed for MinION reads. These changes mean that even low-coverage bins yield very  
760 accurate barcodes; i.e., both barcode quality and quantity are greatly improved.

761

#### 762 *Rapid progress in barcode quality and quantity*

763 We previously tested MinION for barcoding (2018, 2019) and here re-sequenced some of  
764 the same amplicon pools. This allowed for a precise assessment of the improvements. In  
765 2018, sequencing the 511 amplicons of the *Mixed Diptera* sample required one flow cell and  
766 we obtained 488 barcodes of which only one lacked ambiguous bases. In 2021, we used the  
767 remaining ~500 pores of a used R10.3 flow cell (1<sup>st</sup> use was for 49 hours). After washing, we  
768 obtained 502 barcodes and >98% (496) of them were free of ambiguous bases. The results  
769 obtained for the 2019 amplicon pools were also better. In 2019, one flow cell (R9.4) allowed  
770 us to obtain 3,223 barcodes from a pool of amplicons obtained from 4,275 specimens of  
771 *Afrotropical Phoridae*. Resequencing weak amplicons increased the total number of  
772 barcodes by approximately 500 to 3,762 (Srivathsan, Hartop et al. 2019). Now, one R10.3  
773 flow cell yielded 3,905 barcodes (+143) for the same amplicon pool, while retaining an  
774 accuracy of >99.99% and reducing the ambiguities from 0.45% to 0.01%. If progress  
775 continues at this pace, we predict that MinION will be the default barcoding tool for most  
776 users. This, too, is because all barcoding steps can now be carried out in one laboratory with  
777 a modest set of equipment (see Table 4). With MinION being readily available, there is no

778 longer the need to outsource sequencing and/or to wait until enough barcode amplicons  
779 have been prepared for an Illumina or PacBio flow cell (Ho, Puniamoorthy et al. 2020). This  
780 democratizes biodiversity discovery and allows many biologists, government agencies,  
781 students, and citizen scientists from around the globe to get involved in these initiatives.  
782 Biodiversity discovery with cost-effective barcodes will also facilitate biodiversity discovery in  
783 countries with high biodiversity but limited science funding.

784

785

**Table 4.** Equipment required for MinION barcoding

| <b>Required</b>                      |                                                                               |
|--------------------------------------|-------------------------------------------------------------------------------|
| 1                                    | MinION sequencer (preferably Mk1C for basecalling)                            |
| 2                                    | Thermocycler(s)                                                               |
| 3                                    | Gel Electrophoresis setup                                                     |
| 4                                    | Magnetic Separation Rack                                                      |
| 5                                    | Qubit for DNA quantification                                                  |
| 6                                    | <u>Standard equipment:</u> Vortex, Mini-centrifuge, pipettes, freezer, fridge |
| 7                                    | Standard laptop or PC                                                         |
| <b>Optional but highly desirable</b> |                                                                               |
| 1                                    | Multichannel pipette(s)                                                       |
| 2                                    | Hula Mixer                                                                    |

786

787 This raises the question of how much it costs to sequence a barcode with MinION. There is  
788 no straightforward answer because the cost depends on user targets. For example, a user  
789 who wants to sequence a pool of 5000 barcodes may want a 80% success rate in order to  
790 identify the dominant species in a sample. Based on Figure 4, only ca. 1.5 million raw  
791 MinION reads would be needed. On average, MinION flow cells yield >10 million reads and  
792 cost USD 475-900 depending on how many cells are purchased at the same time. Including

793 a library cost of ca. USD 100, the overall sequencing cost of a project that requires 1.5  
794 million reads is USD 180-235. This experiment would be expected to yield 4000 barcodes for  
795 the 5000 amplicons (4-6 cents/barcode). Given the low cost of 1 million MinION reads (\$50-  
796 90), we predict that most users will opt for sequencing at a greater depth since this will likely  
797 yield several hundred additional barcodes. However, this will then increase the sequencing  
798 cost per barcode, because the first 1.5 million reads already recovered barcodes for all  
799 strong amplicons. Additional reads will predominantly strengthen read coverage for these  
800 amplicons and relatively few reads will be added to the read bins that were too weak to yield  
801 barcodes at low coverage; i.e., there are diminishing returns for additional sequencing.

802

803 Overall, we thus predict that most users will, at most, try to multiplex 10,000 amplicons in the  
804 same MinION flow cell so that the sequencing cost per specimen would be 0.06-0.10 USD  
805 depending on the bulk purchase of flow cells. However, we also predict that large-scale  
806 biodiversity projects will switch to sequencing with PromethION, a larger sequencing unit  
807 that can accommodate up to 48 flow cells. This will lower the sequencing cost by more than  
808 60%, as PromethION flow cells have 6 times the number of pores for twice the cost (capacity  
809 per flow cell should be 60,000 barcodes). At the other end of the scale are those users who  
810 occasionally need a few hundred barcodes. They can use Flongle flow cells, which are  
811 comparatively expensive (0.50 USD) because each flow cell costs \$90 and requires a library  
812 that is prepared with half the normal reagents (ca. \$50). A change of the flow cell chemistry  
813 from that of R9.4 to R10.3 would, however, help with improving the quality of the barcodes  
814 obtained from Flongle. Lastly the initial setup cost for MinION/Flongle, can be as low as  
815 1000 USD, but we recommend purchase of Mk1C unit (currently 4900 USD) for easy access  
816 to a GPU that is required for high accuracy basecalling. Note also, that obtaining flow cells at  
817 low cost often requires collaboration between several labs because it allows for buying flow  
818 cells in bulk.

819

820 *ONTbarcode for large-scale species discovery with MinION*

821 There are a number of studies that have used MinION for barcoding fungi, animals, and  
822 plants (Menegon, Cantaloni et al. 2017, Pomerantz, Peñafiel et al. 2018, Wurzbacher,  
823 Larsson et al. 2018, Krehenwinkel, Pomerantz et al. 2019, Maestri, Cosentino et al. 2019,  
824 Chang, Ip et al. 2020, Chang, Ip et al. 2020, Knot, Zouganelis et al. 2020, Seah, Lim et al.  
825 2020, Sahlin, Lim et al. 2021). There is one fundamental difference between these studies  
826 and the vision presented here. These studies tended to show that MinION sequencing can  
827 be done in the field. Thus only a very small number of specimens were analysed (<150 with  
828 the exception of >500 in Chang, Ip et al 2020). The field use is an attractive feature for time-  
829 sensitive samples that could degrade before reaching a lab. However, for the time being it is  
830 unlikely to help substantially with tackling the challenges related to large-scale biodiversity  
831 discovery and monitoring because obtaining few MinION barcodes per flow cell is too  
832 expensive for most researchers in biodiverse countries. Additionally, the bioinformatic  
833 pipelines that were developed for these small-scale projects were not suitable for large-  
834 scale, decentralized barcoding in a large variety of facilities. For example, some of the  
835 studies used ONT's commercial barcoding kit that only allows for multiplexing up to 96  
836 samples in one flow cell (Maestri, Cosentino et al. 2019, Seah, Lim et al. 2020); i.e., each  
837 amplicon had very high read coverage which influenced the corresponding bioinformatics  
838 pipelines (e.g. ONTrack's recommendation is 1000x: Maestri, Cosentino et al. 2019). The  
839 generation of such high coverage datasets also meant that the pipelines were only tested for  
840 such a small number of samples (<60: Menegon, Cantaloni et al. 2017, Maestri, Cosentino et  
841 al. 2019, Seah, Lim et al. 2020, Sahlin, Lim et al. 2021) that these tests were unlikely to  
842 represent the complexities of large, multiplexed amplicon pools (e.g., nucleotide diversity,  
843 uneven coverage).

844

845 ONTbarcoder evolved from miniBarcoder, whose barcodes have been assessed for  
846 accuracy in four different studies covering >8000 barcodes (Chang, Ip et al. 2020, Chang, Ip  
847 et al. 2020, Srivathsan, Baloglu et al. 2018, Srivathsan, Hartop et al. 2019). The new  
848 software introduced here addresses two drawbacks of its precursor, miniBarcoder. Firstly,

849 we dropped the translation-based error correction that tended to increase the number of Ns.  
850 This step used to be essential because indel errors were prevalent in consensus barcodes  
851 obtained with older flow cell models. Secondly, ONTbarcoder can be installed by unzipping a  
852 file and is easy to maintain on different operating systems. Until now, external dependencies  
853 were a major drawback of all MinION bioinformatics pipelines. For example, the one  
854 described by Sahlin et al. (2021) involved minibar/qcat and nanofilt, while NGSpeciesID  
855 relies on isONclust SPOA, Parasail, and optionally, Medaka (Daily 2016, Krehenwinkel,  
856 Pomerantz et al. 2019, Sahlin and Medvedev 2020). These dependencies and complexities  
857 meant that Watsa et al. (2020) recommended bioinformatics training before MinION  
858 barcoding could be used in schools (e.g., training in UNIX command-line) and additionally  
859 required the installation of several software tools onto the teaching computers. Neither is  
860 needed for ONTbarcoder, which runs on a regular laptop and has been extensively tested  
861 (>4000 direct comparisons to Sanger and Illumina barcodes). In addition, ONTbarcoder is  
862 designed in a way that thousands of barcodes can be obtained rapidly without impairing  
863 accuracy; i.e., one can run a very fast analysis by using low read coverage. However, at very  
864 low coverages, fewer barcodes would be recovered because many would not pass the 4 QC  
865 criteria. Speed is also achieved through the parallelization of most steps on UNIX systems  
866 (Mac and Linux; parallelization is restricted to demultiplexing in Windows).

867

868 ONTbarcoder also allows for updating the parameter file for alignment. This is advisable  
869 because MinION continues to evolve quickly. We expect flow cell capacity to increase further  
870 and basecalling to improve (see Xu, Mai et al. 2020). For example, a new basecaller  
871 ("*bonito*") developed by ONT has shown promise by improving raw read accuracy  
872 ([https://nanoporetech.com/about-us/news/new-research-algorithms-yield-accuracy-gains-](https://nanoporetech.com/about-us/news/new-research-algorithms-yield-accuracy-gains-nanopore-sequencing)  
873 [nanopore-sequencing](https://nanoporetech.com/about-us/news/new-research-algorithms-yield-accuracy-gains-nanopore-sequencing)). This basecaller is currently suitable for research teams equipped  
874 with GPU infrastructure and for advanced users familiar with Linux command lines.  
875 However, our preliminary tests of *bonito* for barcoding (Flongle: *Mixed Diptera Subsample*,  
876 *Chironomidae*; R10.3: *Palaeartic Phoridae*, 313 bp; bonito version=0.3.6) does not yet



877 significantly affect barcode quality or quantity (unpublished data). However, this may change  
878 in the immediate future and readers are advised to watch out for developments. Fortunately,  
879 these changes will only further improve MinION barcodes that are already highly accurate  
880 and cost-effective.

881

### 882 *Biodiversity monitoring*

883 Some readers are likely to argue that large-scale biodiversity discovery and monitoring can  
884 be more efficiently carried out via metabarcoding of whole samples consisting of hundreds or  
885 thousands of specimens. This would question the need for large-scale, decentralized  
886 barcoding of individual specimens. However, large-scale barcoding and metabarcoding will  
887 more likely complement each other. For example, large-scale barcoding of individual  
888 specimens remains essential for discovering and describing species as it preserves  
889 individual voucher specimens associated with the barcode which can be used for further  
890 research. Taxonomic research can be guided by examination of putative species units  
891 (molecular Operational Taxonomic Units or mOTUs) using species delimitation algorithms  
892 (either distance based clustering of sequences: Meier, Shiyang et al. 2006; Puillandre,  
893 Brouillet et al. 2020) or tree based methods (Pons, Barraclough et al. 2006; Zhang, Kapli et  
894 al. 2013). In this process, it is important to remember that *COI* lumps recently diverged  
895 species and divides species with deep allopatric splits (Hickerson, Meyer et al. 2006),  
896 making the ability to relate barcodes to individual specimens critical for barcode cluster  
897 validation. High quality barcode databases are important for the analysis of metabarcoding  
898 data because they facilitate the identification of numts, heteroplasmy, contaminants and  
899 errors. Large-scale barcoding will also be needed in order to benefit from another new  
900 technique that may become critical for biodiversity discovery and monitoring; i.e. AI-assisted  
901 analysis of images (Valan, Makonyi et al. 2019). Large-scale barcoding generates identified  
902 specimens that can be imaged and utilized for training neural networks. With increasing  
903 advancements in imaging hardware, computational processing power and machine learning  
904 systems, AI-assisted biodiversity monitoring could be the method of choice in the future

905 because it could quickly determine and count many common species and only specimens  
906 from new/rare species would still require barcoding.

907

## 908 **Conclusions**

909 Many biologists would like to have ready access to barcodes without having to run large and  
910 complex laboratories or send specimens halfway around the world. Many have been  
911 impressed by MinION's low cost, portability, and ability to deliver real-time sequencing, but  
912 they were worried about high cost and complicated bioinformatics pipelines. We here  
913 demonstrate that these concerns are no longer justified. MinION barcodes obtained by  
914 R10.3 flow cells are virtually identical to barcodes obtained with Sanger and Illumina  
915 sequencing. Barcoding with MinION is now also cost-effective and the new "ONTbarcoder"  
916 software makes it straightforward for researchers with little bioinformatics background to  
917 analyze the data on a standard laptop. This will make biodiversity discovery scalable and  
918 accessible to all.

919

## 920 **Acknowledgements**

921 We would like to thank John T. Longino and Michael Branstetter for providing valuable  
922 comments on the manuscript. For the Palaearctic phorid samples, we would like to thank  
923 Dave Karlsson, the Swedish Insect Inventory Project, and the crew at Station Linné that  
924 sorted out the phorids. We would also like to thank Wan Ting Lee for help with molecular  
925 work, and the numerous staff, students and interns who have contributed to the  
926 establishment of the pipeline in the NUS laboratory. We would also like to acknowledge  
927 Suphavitai Chayaporn and Niranjan Nagarajan from Genome Institute of Singapore for their  
928 help with basecalling using bonito. This work was supported by a Ministry of Education grant  
929 on biodiversity discovery (R-154-000-A22-112).

930

## 931 **Software and test dataset availability**

932 ONTbarcoder is available at <https://github.com/asrivathsan/ONTbarcoder>, which also  
933 contains the link to download the raw data and demultiplexing files. The manual for the  
934 software is included in the repository  
935 [https://github.com/asrivathsan/ONTbarcoder/blob/main/ONTBarcoder\\_manual.pdf](https://github.com/asrivathsan/ONTbarcoder/blob/main/ONTBarcoder_manual.pdf). The  
936 videos tutorials can be found in the YouTube channel Integrative Biodiversity Discovery:  
937 <https://www.youtube.com/channel/UC1WowokomhQJRc71FmsUAcg>.

### 938 **Literature cited**

939 Abgrego, N., T. Roslin, T. Huotari, Y. Ji, N.M. Schmidt, J. Wang, D. Yu and O. Ovaskainen  
940 (2021). "Accounting for species interactions is necessary for predicting how arctic  
941 arthropod communities respond to climate change." *Ecography* doi:  
942 10.1111/ecog.05547.

943 Arribas, P., C. Andújar, K. Hopkins, M. Shepherd and A. P. Vogler (2016). "Metabarcoding  
944 and mitochondrial metagenomics of endogean arthropods to unveil the mesofauna of  
945 the soil." *Methods in Ecology and Evolution* **7**(9): 1071-1081.

946 Baloğlu, B., E. Clews and R. Meier (2018). "NGS barcoding reveals high resistance of a  
947 hyperdiverse chironomid (Diptera) swamp fauna against invasion from adjacent  
948 freshwater reservoirs." *Frontiers in Zoology* **15**(1): 31.

949 Bar-On, Y. M., R. Phillips and R. Milo (2018). "The biomass distribution on Earth."  
950 *Proceedings of the National Academy of Sciences* **115**(25): 6506-6511.

951 Barrett, R. D. H. and P. D. Hebert (2005). "Identifying spiders through DNA barcodes."  
952 *Canadian Journal of Zoology* **83**: 481-491.

953 Bell, J.R., D. Blumgart and C.R. Shortall (2020). "Are insects declining and at what rate? An  
954 analysis of standardised, systematic catches of aphid and moth abundances across  
955 Great Britain". *Insect Conservation and Diversity* **13**(2): 115-126.

956 Chang, J. J. M., Y. C. A. Ip, A. G. Bauman and D. Huang (2020). "MinION-in-ARMS:  
957 Nanopore sequencing to expedite barcoding of specimen-rich macrofaunal samples  
958 from autonomous reef monitoring structures." *Frontiers in Marine Science* **7**: 448.

- 959 Chang, J. J. M., Y. C. A. Ip, C. S. L. Ng and D. Huang (2020). "Takeaways from mobile DNA  
960 barcoding with BentoLab and MinION." Genes **11**: 1121.
- 961 Crampton-Platt, A., D. W. Yu, X. Zhou and A. P. Vogler (2016). "Mitochondrial  
962 metagenomics: letting the genes out of the bottle." Gigascience **5**(1): s13742-13016-  
963 10120-y.
- 964 Daily, J. (2016). "Parasail: SIMD C library for global, semi-global, and local pairwise  
965 sequence alignments." BMC Bioinformatics **17**: 81.
- 966 Eisenhauer, N., A. Bonn and C.A. Guerra (2019). "Recognizing the quiet extinction of  
967 invertebrates". Nature Communications **10**: 50.
- 968 Forum, W. E. (2020). "World Economic Forum. The Global Risks Report 2020.", from  
969 <https://www.weforum.org/reports/the-global-risks-report-2020>.
- 970 Frith, M. C., S. Mitsuhashi and K. Katoh (2020). Iamassemble: Multiple Alignment and  
971 Consensus Sequence of Long Reads. Multiple Sequence Alignment. K. Katoh. New  
972 York, Humana: 135-145.
- 973 Groombridge, B., Ed. (1992). Global Biodiversity: Status of the Earth's Living Resources.  
974 World Conservation Monitoring Centre. London, Chapman & Hall.
- 975 Grootaert, P. (2018). "Revision of the genus *Thinophihis* Wahlberg (Diptera: Dolichopodidae)  
976 from Singapore and adjacent regions: A long term study with a prudent reconciliation  
977 of a genetic to a classic morphological approach." Raffles Bulletin of Zoology **66**: 413-  
978 473.
- 979 Grootaert, P. (2019). "Species turnover between the northern and southern part of the South  
980 China Sea in the Elaphropeza Macquart mangrove fly communities of Hong Kong and  
981 Singapore (Insecta: Diptera: Hybotidae)." European Journal of Taxonomy **554**: 1-27.
- 982 Hallman, C.A., M. Sorg, E. Jongejans, H. Siepel, N. Hofland, H. Schwan, W. Stenmans, A.  
983 Müller, H. Sumser, T. Hörren, D. Goulson and H. de kroon (2017). "More than 75  
984 percent decline over 27 years in total flying insect biomass in protected areas." PLoS  
985 One **12**(10): e0185809.

- 986 Hallman, C.A., A. Ssymank, M. Sorg, H. de Kroon and E Jongejans (2021). "Insect biomass  
987 decline scaled to species diversity: General patterns derived from a hoverfly  
988 community." Proceedings of the National Academy of Sciences **118**(2): e2002554117.
- 989 Hamada, M., Y. Ono, K. Asai and M. C. J. B. Frith (2017). "Training alignment parameters  
990 for arbitrary sequencers with LAST-TRAIN." Bioinformatics **33**(6): 926-928.
- 991 Hebert, P. D., T. W. A. Braukmann, S. W. J. Prosser, S. Ratnasingham, J. R. deWaard, N.  
992 V. Ivanova, D. Janzen, W. Hallwachs, S. Naik, J. E. Sones and E. V. Zakharov (2018).  
993 "A Sequel to Sanger: amplicon sequencing that scales." BMC Genomics **19**: 219.
- 994 Hebert, P. D., J. R. DeWaard, E. V. Zakharov, S. W. J. Prosser, J. E. Sones, J. T. A.  
995 McKeown, B. Mantle and J. La Salle (2013). "A DNA 'Barcode Blitz': Rapid digitization  
996 and sequencing of a Natural History collection." PLoS One **8**(7): e68535.
- 997 Hebert, P. D. N., A. Cywinska, S. L. Ball and J. R. deWaard (2003). "Biological identifications  
998 through DNA barcodes." Proceedings of the Royal Society Biological Sciences Series  
999 B **270**(1512): 313-321.
- 1000 Hebert, P. D. N., S. Ratnasingham, E. V. Zakharov, A. C. Telfer, V. Levesque-Beaudin, M.  
1001 A. Milton, S. Pedersen, P. Jannetta and J. R. deWaard (2016). "Counting animal  
1002 species with DNA barcodes: Canadian insects." Philosophical Transactions of the  
1003 Royal Society B: Biological Sciences **371**: 20150333.
- 1004 Hendrich, L., J. Pons, I. Ribera and M. Balke (2010). "Mitochondrial Cox1 sequence data  
1005 reliably uncover patterns of insect diversity but suffer from high lineage-idiosyncratic  
1006 error rates." PLoS One **5**(12): e14448.
- 1007 Hickerson, M. J., C. P. Meyer and Moritz (2006). "DNA barcoding will often fail to discover  
1008 new animal species over broad parameter space." Systematic Biology **55**(5): 729-739.
- 1009 Ho, J. K. I., J. Puniamoorthy, A. Srivathsan and R. Meier (2020). "MinION sequencing of  
1010 seafood in Singapore reveals creatively labelled flatfishes, confused roe, pig DNA in  
1011 squid balls, and phantom crustaceans." Food Control **112**: 107144.

- 1012 Ismay, B. and Y. Ang (2019). "First records of *Pseudogaurax* Malloch 1915 (Diptera:  
1013 Chloropidae) from Singapore, with the description of two new species discovered with  
1014 NGS barcodes." Raffles Bulletin of Zoology **67**: 412-420.
- 1015 Ivanova, N. V., A. V. Borisenko and P. D. N. Hebert (2009). "Express barcodes: racing from  
1016 specimen to identification." Molecular Ecology Resources **9**: 35-41.
- 1017 Ivanova, N. V., J. R. Dewaard and P. D. N. Hebert (2006). "An inexpensive, automation-  
1018 friendly protocol for recovering high-quality DNA." Molecular Ecology Notes **6**(4): 998-  
1019 1002.
- 1020 Katoh, K. and D. M. Standley (2013). "MAFFT Multiple Sequence Alignment Software  
1021 Version 7: Improvements in performance and usability." Molecular Biology and  
1022 Evolution **30**(4): 772-780.
- 1023 Knot, I. E., G. D. Zouganelis, G. D. Weedall, S. A. Wich and R. Rae (2020). "DNA barcoding  
1024 of nematodes using the MinION." Frontiers in Ecology and Evolution **8**: 100.
- 1025 Knox, M. A., I. D. Hogg, C. A. Pilditch, J. C. Garcia-R, P. D. N. Hebert and D. Steinke (2020).  
1026 "Contrasting patterns of genetic differentiation for deep-sea amphipod taxa along New  
1027 Zealand's continental margins." Deep Sea Research Part I: Oceanographic Research  
1028 Papers **162**: 103323.
- 1029 Kranzfelder, P., T. Ekrem and E. Stur (2016). "Trace DNA from insect skins: a comparison of  
1030 five extraction protocols and direct PCR on chironomid pupal exuviae." Molecular  
1031 Ecology Resources **16**(1): 353-363.
- 1032 Krehenwinkel, H., S. R. Kennedy, A. Rueda, A. Lam and R. G. Gillespie (2018). "Scaling up  
1033 DNA barcoding – Primer sets for simple and cost efficient arthropod systematics by  
1034 multiplex PCR and Illumina amplicon sequencing." Methods in Ecology and Evolution  
1035 **9**(11): 2181-2193.
- 1036 Krehenwinkel, H., A. Pomerantz, J. B. Henderson, S. R. Kennedy, J. Y. Lim, V. Swamy, J. D.  
1037 Shoobridge, N. Graham, N. H. Patel, R. G. Gillespie and S. Prost (2019). "Nanopore  
1038 sequencing of long ribosomal DNA amplicons enables portable and simple biodiversity

- 1039 assessments with high phylogenetic resolution across broad taxonomic scale."  
1040 Gigascience **8**(5): giz006.
- 1041 Krell, F. T. (2004). "Parataxonomy vs. taxonomy in biodiversity studies - pitfalls and  
1042 applicability of 'morphospecies' sorting." Biodiversity and Conservation **13**(4): 795-812.
- 1043 Kwong, S., A. Srivathsan and R. Meier (2012). "An update on DNA barcoding: low species  
1044 coverage and numerous unidentified sequences." Cladistics **28**(6): 639-644.
- 1045 Lim, N. K. M., Y. C. Tay, A. Srivathsan, J. W. T. Tan, J. T. B. Kwik, B. Baloğlu, R. Meier and  
1046 D. C. J. Yeo (2016). "Next-generation freshwater bioassessment: eDNA  
1047 metabarcoding with a conserved metazoan primer reveals species-rich and reservoir-  
1048 specific communities." Royal Society Open Science **3**: 160635.
- 1049 Maestri, S., E. Cosentino, M. Paterno, H. Freitag, J. M. Garces, L. Marcolungo, M. Alfano, I.  
1050 Njunjić, M. Schilthuizen, F. Slik, M. Menegon, M. Rossato and M. Delledonne (2019).  
1051 "A rapid and accurate MinION-based workflow for tracking species biodiversity in the  
1052 field." Genes **10**(6): 468.
- 1053 Meier, R., K. Shiyang, G. Vaidya and P.K.L. Ng (2006). "DNA barcoding and taxonomy in  
1054 Diptera: a tale of high intraspecific variability and low identification success."  
1055 Systematic Biology **55**(5): 715-728.
- 1056 Meier, R. (2008). DNA sequences in taxonomy - Opportunities and challenges. New  
1057 Taxonomy. Q. D. Wheeler. **76**: 95-127.
- 1058 Meier, R., W. H. Wong, A. Srivathsan and M. S. Foo (2016). "\$1 DNA barcodes for  
1059 reconstructing complex phenomes and finding rare species in specimen-rich samples."  
1060 Cladistics **32**(1): 100-110.
- 1061 Menegon, M., C. Cantaloni, A. Rodriguez-Prieto, C. Centomo, A. Abdelfattah, M. Rossato,  
1062 M. Bernardi, L. Xumerle, S. Loader and M. Delledonne (2017). "On site DNA barcoding  
1063 by nanopore sequencing." PLoS One **12**(10): e0184741.
- 1064 Ng'endo, R. N., Z. B. Osiemo and R. Brandl (2013). "DNA barcodes for species identification  
1065 in the hyperdiverse ant genus *Pheidole* (Formicidae: Myrmicinae)." Journal of Insect  
1066 Science **13**: 27.

- 1067 Page, R. (2011). "Dark taxa: GenBank in a post-taxonomic world."  
1068 <https://iphylo.blogspot.com/2011/04/dark-taxa-genbank-in-post-taxonomic.html>,  
1069 Accessed February 2021.
- 1070 Pearson, W. R. (2017). "Finding protein and nucleotide similarities with FASTA." Current  
1071 Protocols in Bioinformatics **53**: 3.9.1-3.9.25.
- 1072 Pomerantz, A., N. Peñafiel, A. Arteaga, L. Bustamante, F. Pichardo, L. A. Coloma, C. L.  
1073 Barrio-Amorós, D. Salazar-Valenzuela and S. J. G. Prost (2018). "Real-time DNA  
1074 barcoding in a rainforest using nanopore sequencing: opportunities for rapid  
1075 biodiversity assessments and local capacity building." **7**(4): giy033.
- 1076 Ponder, W. and D. Lunney (1999). The Other 99% - the Conservation and Biodiversity of  
1077 Invertebrates. Sydney, Transactions of the Royal Zoological Society of New South  
1078 Wales.
- 1079 Pons, J., T.G. Barraclough, J. Gomez-Zurita, A. Cardoso, D.P. Duran, S. Hazell, S. Kamoun,  
1080 W.D. Sumlin and A.P. Vogler (2006). Sequence-Based Species Delimitation for the  
1081 DNA Taxonomy of Undescribed Insects. Systematic Biology **55**(4): 595-609.
- 1082 Puillandre, N., S. Brouillet, G. Achaz (2021). ASAP: assemble species by automatic  
1083 partitioning. Molecular Ecology Resources **21**: 609-620.
- 1084 Stepanian, P.M., S.A. Entrekin, C.E. Wainwright, D.Mirkovic, J.L. Tank and J.F. Kelly (2020).  
1085 "Declines in an abundant aquatic insect, the burrowing mayfly, across major North  
1086 American waterways." Proceedings of the National Academy of Sciences **117**(6):  
1087 2987-2992.
- 1088 Swiss Re. (2020). " Biodiversity and Ecosystem Services A business case for re/insurance."  
1089 Zurich, Swiss Re Management Ltd.
- 1090 Rohland, N. and D. Reich (2012). "Cost-effective, high-throughput DNA sequencing libraries  
1091 for multiplexed target capture." Genome research **22**: 939-946.
- 1092 Sahlin, K., M. C. W. Lim and S. Prost (2021). "NGSpeciesID: DNA barcode and amplicon  
1093 consensus generation from long-read sequencing data." Ecology and Evolution **11**(3):  
1094 1392-1398.



- 1095 Sahlin, K. and P. Medvedev (2020). "De novo clustering of long-read transcriptome data  
1096 using a greedy, quality value-based algorithm." Journal of Computational Biology  
1097 **27**(4): 472-484.
- 1098 Samoh, A., C. Satasook and P. Grootaert (2019). "NGS-barcodes, haplotype networks  
1099 combined to external morphology help to identify new species in the mangrove genus  
1100 *Ngirhaphium* Evenhuis & Grootaert, 2002 (Diptera: Dolichopodidae: Rhaphiinae) in  
1101 Southeast Asia." Raffles Bulletin of Zoology **67**: 640-659.
- 1102 Seah, A., M. C. W. Lim, D. McAloose, S. Prost and T. A. Seimon (2020). "MinION-based  
1103 DNA barcoding of preserved and non-invasively collected wildlife samples." Genes  
1104 **11**(4): 445.
- 1105 Shokralla, S., T. M. Porter, J. F. Gibson, R. Dobosz, D. Janzen, W. Hallwachs, G. B. Golding  
1106 and M. Hajibabaei (2015). "Massively parallel multiplex DNA sequencing for specimen  
1107 identification using an Illumina MiSeq platform." Scientific Reports **5**: 9687.
- 1108 Shokralla, S., J. L. Spall, J. F. Gibson and M. Hajibabaei (2012). "Next-generation  
1109 sequencing technologies for environmental DNA research." Molecular Ecology **21**(8):  
1110 1794-1805.
- 1111 Silvestre-Ryan, J. and I. Holmes (2021). "Pair consensus decoding improves accuracy of  
1112 neural network basecallers for nanopore sequencing." Genome Biology **22**: 38.
- 1113 Sović, I., M. Šikić, A. Wilm, S. N. Fenlon, S. Chen and N. Nagarajan (2016). "Fast and  
1114 sensitive mapping of nanopore sequencing reads with GraphMap." Nature  
1115 Communications **7**: 11307.
- 1116 Srivathsan, A., B. Baloğlu, W. Wang, W. X. Tan, D. Bertrand, A. H. Q. Ng, E. J. H. Boey, J.  
1117 J. Y. Koh, N. Nagarajan and R. Meier (2018). "A MinION-based pipeline for fast and  
1118 cost-effective DNA barcoding." Molecular Ecology Resources **18**(5): 1035-1049.
- 1119 Srivathsan, A., E. Hartop, J. Puniamoorthy, W. T. Lee, S. N. Kutty, O. Kurina and R. Meier  
1120 (2019). "Rapid, large-scale species discovery in hyperdiverse taxa using 1D MinION  
1121 sequencing." BMC Biology **17**(1): 96.

- 1122 Srivathsan, A., N. Nagarajan and R. Meier (2019). "Boosting natural history research via  
1123 metagenomic clean-up of crowdsourced feces." PLoS Biology **17**(11): e3000517.
- 1124 Stork, N. E., J. McBroom, C. Gely and A. J. Hamilton (2015). "New approaches narrow  
1125 global species estimates for beetles, insects, and terrestrial arthropods." Proceedings  
1126 of the National Academy of Sciences **112**(24): 7519-7523.
- 1127 Stribling, J. B., K. L. Pavlik, S. M. Holdsworth and E. W. Leppo (2008). "Data quality,  
1128 performance, and uncertainty in taxonomic identification for biological assessments."  
1129 Journal of the North American Benthological Society **27**(4): 906-919.
- 1130 Tang, C. F., P. Grootaert and D. Yang (2018). "*Protomedetera*, a new genus from the  
1131 Oriental and Australasian realms (Diptera, Dolichopodidae, Medeterinae)." Zookeys  
1132 **743**: 137-151.
- 1133 Tang, C. F., D. Yang and P. Grootaert (2018). "Revision of the genus *Lichtwardtia* Enderlein  
1134 in Southeast Asia, a tale of highly diverse male terminalia (Diptera, Dolichopodidae)."  
1135 Zookeys **798**: 63-107.
- 1136 Tautz, D., P. Arctander, A. Minelli, R. H. Thomas and A. P. Vogler (2003). "A plea for DNA  
1137 taxonomy." Trends in Ecology & Evolution **18**(2): 70-74.
- 1138 Thongjued, K., W. Chotigeat, S. Bumrungsri, P. Thanakiatkrai and T. Kitpipit (2019). "A new  
1139 cost-effective and fast direct PCR protocol for insects based on PBS buffer." Molecular  
1140 Ecology Resources **19**(3): 691-701.
- 1141 Thormann, B., D. Ahrens, D. M. Armijos, M. K. Peters and T. Wagner (2016). "Exploring the  
1142 leaf beetle fauna (Coleoptera: Chrysomelidae) of an Ecuadorian mountain forest using  
1143 DNA barcoding." PLoS One **11**(2): e0148268.
- 1144 Truett, G., P. Heeger, R. Mynatt, A. Truett, J. Walker and M. J. B. Warman (2000).  
1145 "Preparation of PCR-quality mouse genomic DNA with hot sodium hydroxide and tris  
1146 (HotSHOT)." Biotechniques **29**(1): 52-54.
- 1147 Valan, M., K. Makonyi, A. Maki, D. Vondráček and F. Ronquist (2019). "Automated  
1148 taxonomic identification of insects with expert-level accuracy using effective feature  
1149 transfer from convolutional networks." Systematic Biology **68**(6): 876-895.

- 1150 Vaser, R., I. Sovic, N. Nagarajan and M. Sikic (2017). "Fast and accurate de novo genome  
1151 assembly from long uncorrected reads." Genome Res **27**(5): 737-746.
- 1152 Vereecke, N., J. Bokma, F. Haesebrouck, H. Nauwynck, F. Boyen, B. Pardon and S. Theuns  
1153 (2020). "High quality genome assemblies of *Mycoplasma bovis* using a taxon-specific  
1154 Bonito basecaller for MinION and Flongle long-read nanopore sequencing." BMC  
1155 Bioinformatics **21**: 517.
- 1156 Wagner, D.L. E.M. Grames, M.L. Forister, M.R. Berenbaum and D. Stopak (2021). "Insect  
1157 decline in the Anthropocene: Death by a thousand cuts." Proceedings of the National  
1158 Academy of Sciences **118**(2): e2023989118.
- 1159 Wang, W. Y., A. Srivathsan, M. Foo, S. K. Yamane and R. Meier (2018). "Sorting specimen-  
1160 rich invertebrate samples with cost-effective NGS barcodes: Validating a reverse  
1161 workflow for specimen processing." Molecular Ecology Resources **18**(3): 490-501.
- 1162 Wang, W. Y., A. Yamada and K. Eguchi (2018). "First discovery of the mangrove ant  
1163 *Pheidole sexspinosa* Mayr, 1870 (Formicidae: Myrmicinae) from the Oriental region,  
1164 with redescrptions of the worker, queen and male." Raffles Bulletin of Zoology **66**:  
1165 652-663.
- 1166 Wang, W. Y., A. Yamada and S. Yamane (2020). "Maritime trap-jaw ants (Hymenoptera,  
1167 Formicidae, Ponerinae) of the Indo-Australian region - redescription of *Odontomachus*  
1168 *malignus* Smith and description of a related new species from Singapore, including  
1169 first descriptions of males." Zookeys **915**: 137-174.
- 1170 Wang, W. Y., G. W. J. Yong and W. Jaitrong (2018). "The ant genus *Rhopalomastix*  
1171 (Hymenoptera: Formicidae: Myrmicinae) in Southeast Asia, with descriptions of four  
1172 new species from Singapore based on morphology and DNA barcoding." Zootaxa  
1173 **4532**(3): 301-340.
- 1174 Watsa, M., G. A. Erkenwick, a. Pomerantz and S. Prost (2020). "Portable sequencing as a  
1175 teaching tool in conservation and biodiversity research." PLoS Biology **18**(4):  
1176 e3000667.

- 1177 Wick, R. R. (2019). "Performance of neural network basecalling tools for Oxford Nanopore  
1178 sequencing." Genome Biology **20**: 129.
- 1179 Wong, W. H., Y. C. Tay, J. Puniamoorthy, M. Balke, P. S. Cranston and R. Meier (2014).  
1180 "Direct PCR' optimization yields a rapid, cost-effective, nondestructive and efficient  
1181 method for obtaining DNA barcodes without DNA extraction." Molecular Ecology  
1182 Resources **14**(6): 1271-1280.
- 1183 Wurzbacher, C., E. Larsson, J. Bengtsson-Palme, S. V. den Wyngaert, S. Svantesson, E.  
1184 Kristiansson, M. Kagami and R. H. Nilsson (2018). "Introducing ribosomal tandem  
1185 repeat barcoding for fungi." Molecular Ecology Resources **19**(1): 118-127.
- 1186 Xu, Z., Y. Mai, D. Liu, W. He, X. Lin, C. Xu, L. Zhang, X. Meng, J. Mafofo, W. A. Zaher, Y. Li  
1187 and N. Qiao (2020). "Fast-Bonito: A faster basecaller for nanopore sequencing."  
1188 BioRxiv: doi:10.1101/2020.1110.1108.318535.
- 1189 Yeo, D., J. Puniamoorthy, R. W. J. Ngiam and R. Meier (2018). "Towards holomorphology in  
1190 entomology: rapid and cost-effective adult-larva matching using NGS barcodes."  
1191 Systematic Entomology **43**(4): 678-691.
- 1192 Yeo, D., A. Srivathsan and R. Meier (2020). "Longer is Not Always Better: Optimizing  
1193 Barcode Length for Large-Scale Species Discovery and Identification." Systematic  
1194 Biology **69**(5): 999-1015.
- 1195 Yeo, D., A. Srivathsan, J. Puniamoorthy, M. Foo, P. Grootaert, L. Chan, B. Guenard, C.  
1196 Damken, R. A. Wahab and Y. J. b. Ang (2020). "Mangroves are an overlooked hotspot  
1197 of insect diversity despite low plant diversity." BioRxiv:  
1198 doi:10.1101/2020.12.17.423191.
- 1199 Zhang, J. P. Kapli, P. Pavlidis and A. Stamatakis (2013). "A general species delimitation  
1200 method with applications to phylogenetic placements." Bioinformatics **29**(22): 2869-  
1201 2876.
